# Supplementary material for: London dispersion dominating diamantane packing in helium nanodroplets
Source: PubMed Central journal article supplement (PMC8494270; doi:10.1039/d1cp03380h), 2021-09-20
Supplement: CP-023-D1CP03380H-s002.pdf [file CP-023-D1CP03380H-s002.pdf]

Supporting information

## London Dispersion Dominating Diamantane Packing in Helium Nanodroplets

Jasna Alić,<sup>a,‡</sup> Roman Messner,<sup>b,‡</sup> Florian Lackner,<sup>b,\*</sup> Wolfgang E. Ernst,<sup>b,\*</sup> Marina Šekutor,<sup>a,\*</sup>

<sup>a</sup> Department of Organic Chemistry and Biochemistry, Ruđer Bošković Institute, Bijenička  
cesta 54, 10 000 Zagreb, Croatia, [msekutor@irb.hr](mailto:msekutor@irb.hr)

<sup>b</sup> Institute of Experimental Physics, Graz University of Technology, Petersgasse 16, 8010  
Graz, Austria, [wolfgang.ernst@tugraz.at](mailto:wolfgang.ernst@tugraz.at), [florian.lackner@tugraz.at](mailto:florian.lackner@tugraz.at)

<sup>‡</sup>Both contributors are considered first authors.

## 1. Computations

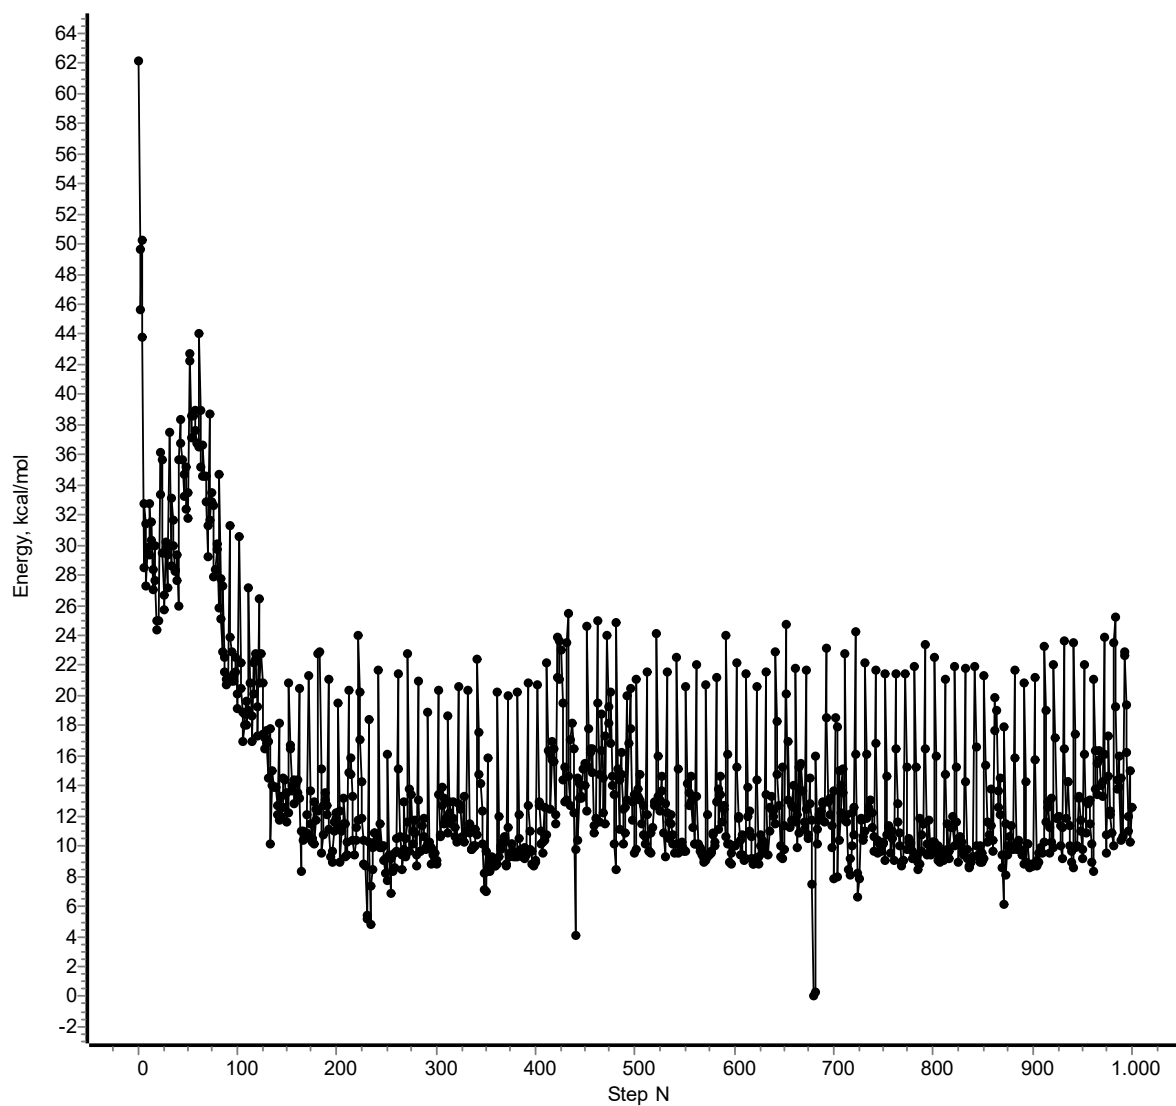

**Figure S1.** Trajectory from a constrained meta-dynamics (MTD) simulation of **CL2** using the GFN2-xTB method lasting for 100 ps with a timestep of 1 fs at a temperature of 0.4 K.

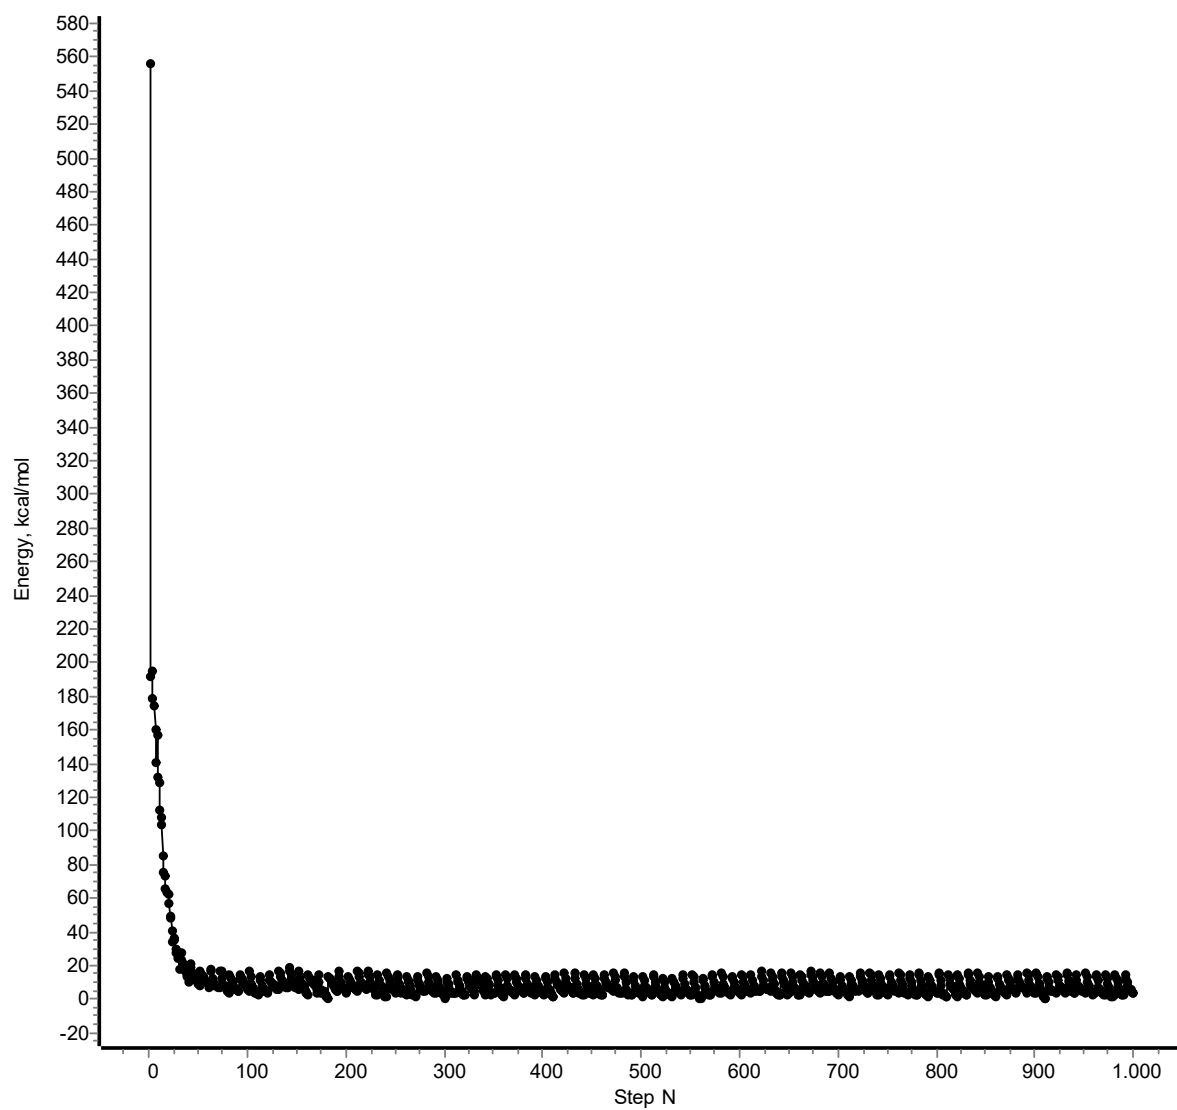

**Figure S2.** Trajectory from a constrained meta-dynamics (MTD) simulation of **CL13** using the GFN2-xTB method lasting for 100 ps with a timestep of 1 fs at 0.4 K.

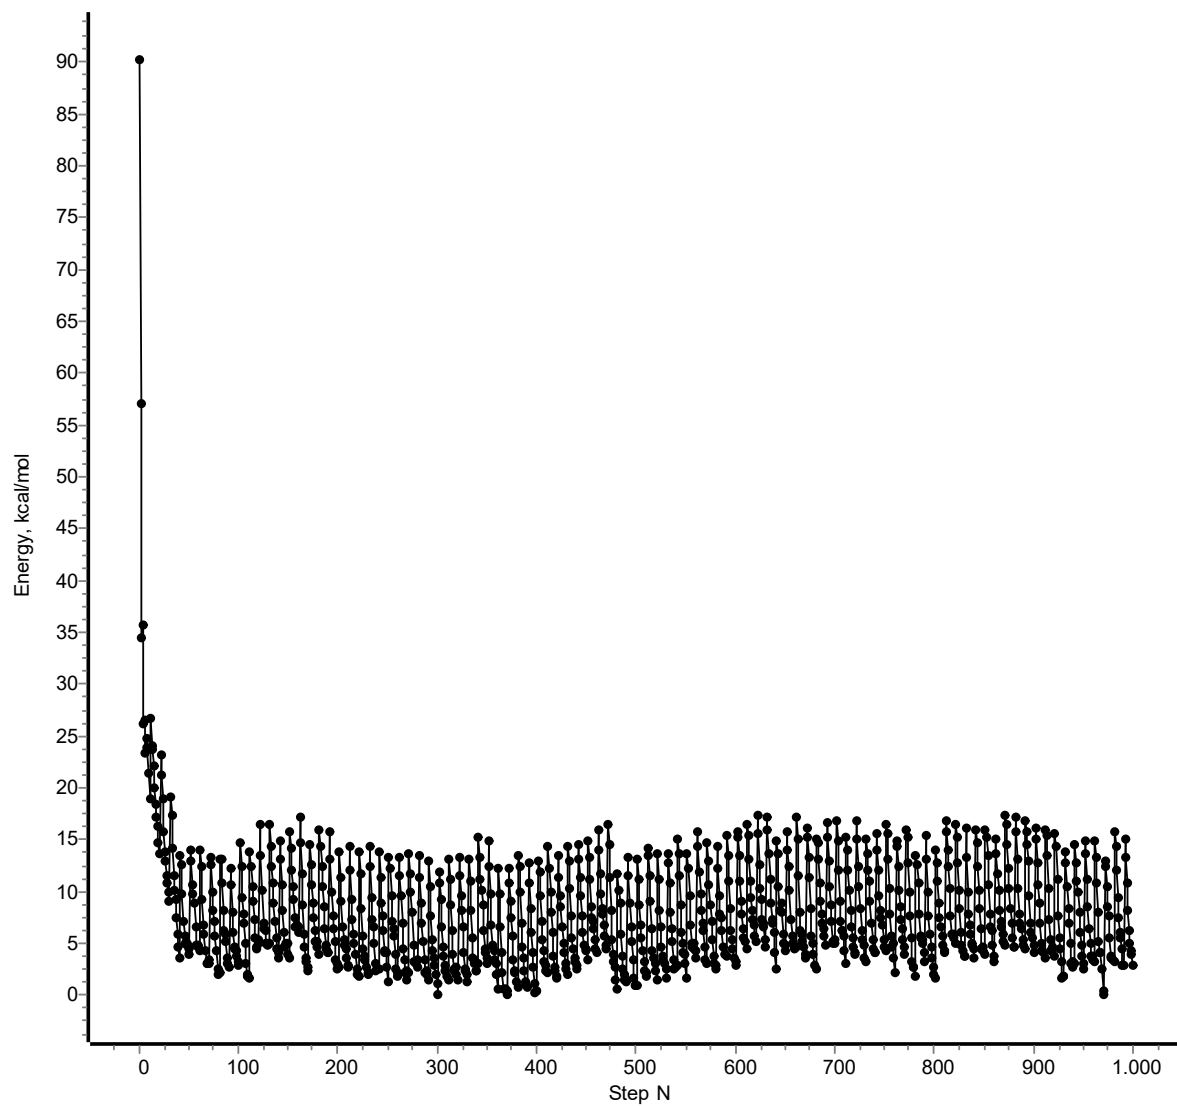

**Figure S3.** Trajectory from a constrained meta-dynamics (MTD) simulation of **CL19** using the GFN2-xTB method lasting for 100 ps with a timestep of 1 fs at 0.4 K.

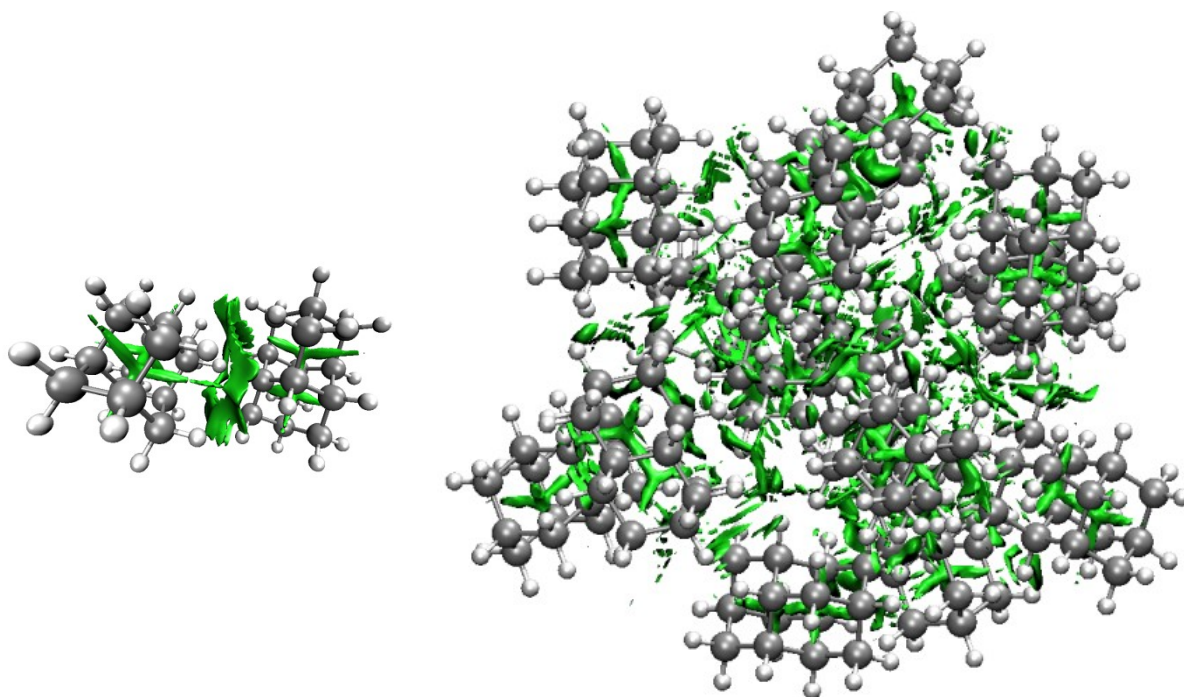

a)

b)

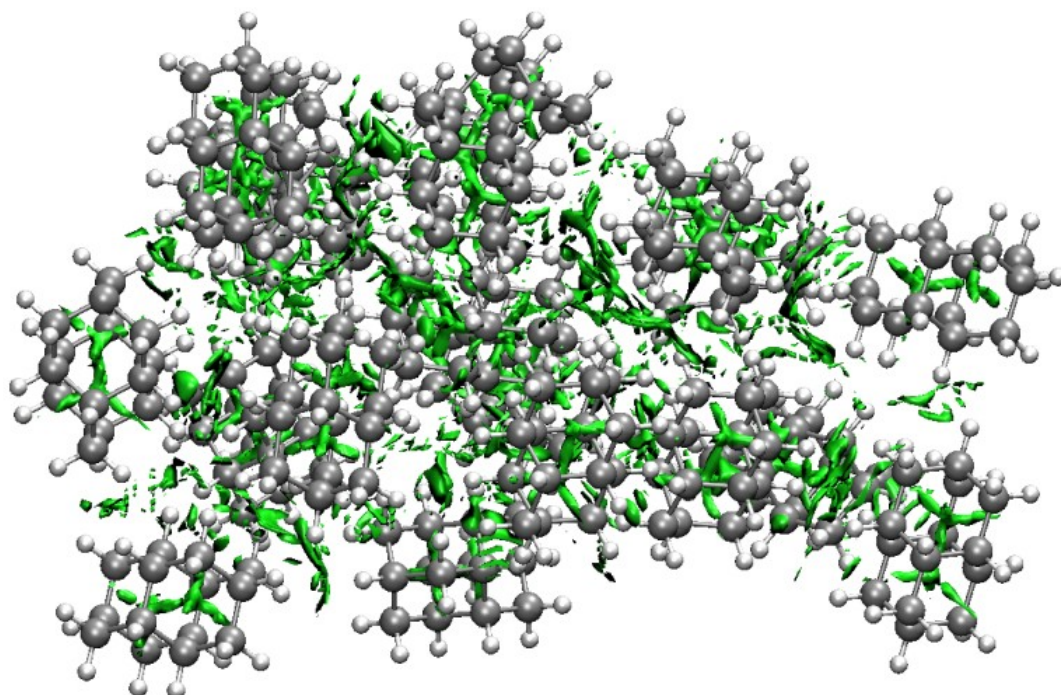

c)

**Figure S4.** NCI plots of **CL2** (a), **CL13** (b) and **CL19** (c). Non-covalent interactions are depicted in green.

**Table S1.** Electronic energies, zero-point vibrational energies, enthalpies and Gibbs energies of diamantane (**D**), 1-diamantyl cation (**Dp**) and clusters **CL2**, **CL13** and **CL19** in Hartree computed using the GFN2-xTB method at 0.4 K.

| compound    | <i>E</i>    | <i>ZPVE</i> | <i>H</i>    | <i>G</i>    |
|-------------|-------------|-------------|-------------|-------------|
| <b>D</b>    | -40.292908  | 0.312047    | -39.980856  | -39.980866  |
| <b>Dp</b>   | -39.689966  | 0.298400    | -39.391561  | -39.391573  |
| <b>CL2</b>  | -79.991445  | 0.609472    | -79.381968  | -79.381981  |
| <b>CL13</b> | -523.327286 | 4.049740    | -519.277541 | -519.277484 |
| <b>CL19</b> | -765.155096 | 5.925712    | -759.229379 | -759.229283 |

**Table S2.** Electronic energies of diamantane (**D**), 1-diamantyl cation (**Dp**) and clusters **CL2**, **CL13** and **CL19** in Hartree computed at various levels of theory at 0.4 K.<sup>a</sup>

| level of theory                     | <b>D</b>    | <b>Dp</b>   | <b>CL2</b>   | <b>CL13 s.p.</b> | <b>CL19 s.p.</b> |
|-------------------------------------|-------------|-------------|--------------|------------------|------------------|
| HF-3c                               | -538.455970 | -537.596438 | -1076.065555 | -6999.239776     | -10230.072868    |
| PBEh-3c                             | -544.416185 | -543.524277 | -1087.954447 | -7076.701972     | -10343.290096    |
| B3LYP-gCP-D3(BJ)/def2-TZVPP         | -545.439573 | -544.561400 | -1090.015310 | -7090.011461     | -10362.742886    |
| B3LYP-gCP-D3(BJ)-ABC/def2-TZVPP     | -545.439079 | -544.560961 | -1090.013829 | -7089.990531     | -10362.711159    |
| B3LYP-gCP/def2-TZVPP                | -545.359585 | -544.483153 | -1089.844172 | n.d.             | n.d.             |
| $\omega$ B97X-gCP-D3(BJ)/def2-TZVPP | -546.087719 | -545.193132 | -1091.292373 | -7098.415323     | -10375.033228    |
| TightPNO-DLPNO-CCSD(T)/cc-pVTZ      | -544.570843 | -543.679302 | -1088.261099 | n.d.             | n.d.             |

<sup>a</sup> Geometries for **CL13** and **CL19** single point computations from the GFN2-xTB level of theory optimization at 0.4 K.

**Table S3.** Electronic energies of diamantane (**D**), 1-diamantyl cation (**Dp**) and cluster **CL2** and interaction energies,  $\Delta H(0\text{ K})$ , for **CL2** computed at various levels of theory with or without the geometrical counterpoise (gCP) correction.<sup>a,b</sup>

| Level of theory                                   | $E(\mathbf{D})$ / Hartree | $E(\mathbf{Dp})$ / Hartree | $E(\mathbf{CL2})$ / Hartree | $\Delta H_{0\text{K}}(\mathbf{CL2})^c$ / kcal mol <sup>-1</sup> |
|---------------------------------------------------|---------------------------|----------------------------|-----------------------------|-----------------------------------------------------------------|
| <b>B3LYP-gCP-D3(BJ)/def2-TZVPP</b>                | -545.439573               | -544.561400                | -1090.015310                | <b>-8.4</b>                                                     |
| <b>B3LYP-D3(BJ)/def2-TZVPP</b>                    | -545.463886               | -544.584505                | -1090.064070                | <b>-9.5</b>                                                     |
| <b><math>\omega</math>B97X-gCP-D3(BJ)/cc-pVDZ</b> | -545.875011               | -544.983341                | -1090.867050                | <b>-4.8</b>                                                     |
| <b><math>\omega</math>B97X-D3(BJ)/cc-pVDZ</b>     | -545.965977               | -545.070619                | -1091.049375                | <b>-7.7</b>                                                     |
| B3LYP-gCP-D3(BJ)/6-31G(d)                         | -545.173000               | -544.302869                | -1089.488033                | -7.0                                                            |
| B3LYP-gCP-D3(BJ)/6-31+G(d,p)                      | -545.209420               | -544.334072                | -1089.554587                | -6.3                                                            |
| B3LYP-gCP-D3(BJ)/aug-cc-pVDZ                      | -545.299474               | -544.421622                | -1089.739607                | -11.0                                                           |
| B3LYP-gCP-D3(BJ)/cc-pVDZ                          | -545.269196               | -544.392380                | -1089.677294                | -9.2                                                            |
| B3LYP-gCP-D3(BJ)/def2-TZVP                        | -545.432167               | -544.554168                | -1090.000545                | -8.3                                                            |
| $\omega$ B97X-gCP-D3(BJ)/aug-cc-pVDZ              | -545.899884               | -545.008649                | -1090.919261                | -6.1                                                            |
| $\omega$ B97X-gCP-D3(BJ)/def2-TZVP                | -546.081411               | -545.186981                | -1091.279850                | -6.6                                                            |
| $\omega$ B97X-gCP-D3(BJ)/def2-TZVPP               | -546.087719               | -545.193132                | -1091.292373                | -6.6                                                            |

<sup>a</sup> Interaction energies are defined as a difference between the energy of the cluster and the energy of the corresponding number of diamantane moieties. <sup>b</sup> Single point computations done on optimized geometries obtained by using the B3LYP-D3(BJ)/def2-TZVPP level of theory. <sup>c</sup> *ZPVE* taken from GFN2-xTB computations.

**Table S4.** Geometries of diamantane (**D**), 1-diamantyl cation (**Dp**) and clusters **CL2**, **CL13** and **CL19** in Cartesian coordinates in Å computed using the GFN2-xTB method at 0.4 K.

| <b>D</b> |               |              |             |
|----------|---------------|--------------|-------------|
| 1        | -6.922650380  | -0.687599871 | 4.116590698 |
| 6        | -6.677725611  | -0.933747254 | 5.157024171 |
| 1        | -6.653967466  | -3.058765143 | 4.791389859 |
| 6        | -7.157481778  | -2.354242769 | 5.464592076 |
| 1        | -7.540260243  | 0.407161785  | 8.209362171 |
| 6        | -7.036746086  | -0.297360114 | 7.536159587 |
| 1        | -7.271577855  | -1.964002593 | 8.884161842 |
| 6        | -7.516502511  | -1.717855609 | 7.843728469 |
| 1        | -7.124065008  | -3.716549219 | 7.135804875 |
| 6        | -6.794808065  | -2.694480854 | 6.912099365 |
| 1        | -7.070163953  | 1.064946675  | 5.864947186 |
| 6        | -7.399420753  | 0.042878205  | 6.088652860 |
| 1        | -9.164020666  | 0.202731758  | 4.855624949 |
| 6        | -8.910339477  | -0.055135796 | 5.886885386 |
| 1        | -4.775378396  | -3.306040713 | 6.456414908 |
| 6        | -5.283891506  | -2.596462489 | 7.113880905 |
| 1        | -9.418857445  | 0.654440295  | 6.544351379 |
| 1        | -5.030205842  | -2.854328128 | 8.145141508 |
| 1        | -9.002014744  | -3.475582663 | 5.469132712 |
| 6        | -8.668036277  | -2.455852196 | 5.261876024 |
| 1        | -4.828486243  | 0.179249390  | 5.121288754 |
| 6        | -5.166631194  | -0.833094929 | 5.356161183 |
| 1        | -9.365745558  | -2.830864648 | 7.879455369 |
| 6        | -9.027595453  | -1.818520522 | 7.644586006 |
| 1        | -5.192206834  | 0.823987343  | 7.531609570 |
| 6        | -5.526190947  | -0.195742079 | 7.738867030 |
| 1        | -9.537468441  | -1.129373558 | 8.322416745 |
| 1        | -5.275315220  | -0.425788764 | 8.777369361 |
| 1        | -8.918916936  | -2.225804527 | 4.223374088 |
| 1        | -4.656753837  | -1.522241971 | 4.678332269 |
| 6        | -4.819601035  | -1.174909935 | 6.803686912 |
| 6        | -9.374627389  | -1.476692530 | 6.197063984 |
| 1        | -3.735442411  | -1.103081688 | 6.948071898 |
| 1        | -10.458785986 | -1.548520698 | 6.052678883 |

| <b>Dp</b> |              |              |              |
|-----------|--------------|--------------|--------------|
| 1         | -0.098069070 | 2.149599953  | 1.179912168  |
| 1         | -0.098095734 | -2.149541254 | 1.180016655  |
| 1         | 0.109104533  | 2.119139261  | -1.289351102 |
| 1         | 0.089545733  | 0.000059807  | 2.446001576  |
| 1         | 0.109079661  | -2.119204746 | -1.289246192 |
| 1         | -2.191033955 | -1.274088608 | -1.765294424 |
| 1         | -2.155990224 | 2.145522986  | -0.236064710 |
| 1         | -2.155356981 | -0.880184950 | 1.947203806  |
| 1         | 2.161974022  | 2.147860601  | 0.150652112  |
| 1         | 2.198176185  | -1.289318428 | 1.680727889  |
| 1         | 2.095944644  | -0.892843494 | -2.026946755 |
| 1         | -2.156017184 | -2.145509570 | -0.235961711 |
| 1         | -2.191020931 | 1.274030080  | -1.765356148 |
| 1         | -2.155348555 | 0.880304366  | 1.947162614  |
| 1         | 2.198193908  | 1.289374830  | 1.680665724  |



|   |              |              |              |
|---|--------------|--------------|--------------|
| 1 | 2.161948506  | -2.147879807 | 0.150756788  |
| 1 | 2.095955785  | 0.892718027  | -2.026991875 |
| 6 | 1.745215842  | -0.000047554 | -1.512935617 |
| 6 | 1.804663274  | 1.253112699  | 0.663329528  |
| 6 | 1.804647307  | -1.253102308 | 0.663389409  |
| 6 | -1.809630130 | 1.244727147  | -0.743499851 |
| 6 | -1.790624880 | 0.000045521  | 1.416503255  |
| 6 | -1.809644806 | -1.244742090 | -0.743438839 |
| 6 | 2.311578637  | -0.000014710 | -0.037252102 |
| 6 | -2.313257004 | 0.000013294  | -0.019393731 |
| 6 | 0.282959237  | -1.240417601 | 0.708047202  |
| 6 | 0.319396781  | -0.000032443 | -1.238334120 |
| 6 | 0.282974901  | 1.240449016  | 0.707986337  |
| 6 | -0.259763066 | 0.000036289  | 1.408619555  |
| 6 | -0.283565287 | -1.236938358 | -0.780078239 |
| 6 | -0.283550610 | 1.236903129  | -0.780138546 |
| 1 | 3.401385173  | -0.000022981 | -0.104005386 |
| 1 | -3.405472077 | 0.000020130  | -0.008525328 |

---

**CL2**

|   |              |              |              |
|---|--------------|--------------|--------------|
| 1 | 1.370489985  | -0.650040867 | -6.404975478 |
| 1 | 1.635387689  | 1.782585310  | -6.004025242 |
| 1 | 0.175768379  | -1.204258134 | -2.338796875 |
| 1 | 0.425318758  | 1.256181763  | -1.934559012 |
| 1 | 1.426666223  | 2.663458347  | -3.697990180 |
| 1 | 0.359143062  | -2.075817725 | -4.648926779 |
| 1 | 2.821540772  | -1.982236356 | -4.809876471 |
| 1 | -0.553921786 | 2.775320994  | -5.186636109 |
| 1 | 2.318202127  | -2.196923974 | -3.133711563 |
| 1 | -1.034986814 | 2.561295139  | -3.504809982 |
| 1 | 3.604210929  | 1.658308760  | -4.505279877 |
| 1 | -1.092928392 | -0.752340959 | -6.251779255 |
| 1 | 2.884017518  | 1.343388708  | -2.106523562 |
| 1 | -1.771645359 | -1.133228672 | -3.899758509 |
| 1 | 2.359781371  | -0.244034167 | -1.543093920 |
| 1 | -1.893009762 | 0.195359851  | -2.712535769 |
| 1 | 3.577626503  | 0.292347841  | -5.620029243 |
| 1 | -0.575908244 | 0.850907902  | -6.778855373 |
| 6 | -0.564622122 | 0.151554294  | -5.941840882 |
| 6 | 3.065727852  | 0.746874926  | -4.770235069 |
| 6 | -1.249740259 | -0.214373868 | -3.620847297 |
| 6 | 2.357193840  | 0.434087946  | -2.399746464 |
| 6 | -0.538902734 | 2.076199942  | -4.349406360 |
| 6 | 2.320747048  | -1.496090201 | -3.971181665 |
| 6 | -1.278726732 | 0.797945058  | -4.742169645 |
| 6 | 3.062795477  | -0.218550660 | -3.586419636 |
| 6 | 0.164280467  | -0.496471129 | -3.175219794 |
| 6 | 0.920302559  | 0.778310543  | -2.788779626 |
| 6 | 0.871192771  | -0.181980453 | -5.550879209 |
| 6 | 1.627711382  | 1.089344780  | -5.156757637 |
| 6 | 0.904497896  | 1.742756085  | -3.976163350 |
| 6 | 0.887404501  | -1.156024346 | -4.373485625 |
| 1 | -2.308406942 | 1.030609991  | -5.031285298 |
| 1 | 4.091732513  | -0.463844306 | -3.309733865 |
| 6 | -5.137073329 | 1.667221367  | -1.884344105 |

|   |              |              |              |
|---|--------------|--------------|--------------|
| 6 | -5.833085207 | 0.364841568  | -1.507172305 |
| 6 | -4.879785748 | -0.508069423 | -0.699198363 |
| 1 | -5.803815329 | 2.297790396  | -2.477374329 |
| 1 | -6.722243646 | 0.580620271  | -0.913434976 |
| 1 | -6.160034665 | -0.163158937 | -2.405065671 |
| 1 | -5.368197203 | -1.450524888 | -0.436491159 |
| 6 | -4.678104267 | 2.406768698  | -0.633155489 |
| 6 | -3.890778572 | 1.331617811  | -2.743751473 |
| 6 | -3.620560153 | -0.849777961 | -1.550915409 |
| 6 | -4.419665099 | 0.212487649  | 0.566990854  |
| 6 | -3.733910946 | 1.518602509  | 0.168973551  |
| 1 | -4.179723931 | 3.338914723  | -0.906486384 |
| 1 | -5.542596829 | 2.666306868  | -0.020798412 |
| 6 | -3.027435260 | 0.479898411  | -1.878430426 |
| 1 | -4.212349618 | 0.801883165  | -3.641183602 |
| 1 | -3.396145513 | 2.259190858  | -3.032534527 |
| 6 | -2.680600043 | -1.737943023 | -0.736828663 |
| 1 | -3.949222486 | -1.369853890 | -2.456077361 |
| 6 | -3.471210008 | -0.673082539 | 1.374088142  |
| 1 | -5.295188015 | 0.445481463  | 1.180428188  |
| 6 | -2.471670437 | 1.174138094  | -0.681277668 |
| 1 | -3.392048880 | 2.048589771  | 1.062408737  |
| 6 | -2.243384438 | -1.001784927 | 0.528070502  |
| 1 | -3.197813305 | -2.660367698 | -0.470081761 |
| 1 | -1.811421123 | -2.011073729 | -1.337801383 |
| 1 | -3.168831688 | -0.157068378 | 2.286435560  |
| 1 | -3.981851567 | -1.591747165 | 1.665988574  |
| 6 | -1.533729746 | 0.294600179  | 0.144736405  |
| 1 | -1.976573323 | 2.110454785  | -0.957120716 |
| 1 | -1.561317253 | -1.634541939 | 1.101796781  |
| 1 | -0.628190921 | 0.074094290  | -0.421495838 |
| 1 | -1.234565601 | 0.835281761  | 1.043718097  |

---

**CL13**


---

|   |              |              |              |
|---|--------------|--------------|--------------|
| 1 | -0.274923490 | 0.474360982  | 5.393782943  |
| 1 | -3.405945235 | -0.752859755 | -7.737089844 |
| 1 | 2.638521151  | -3.129784741 | -0.820424186 |
| 1 | 4.651346118  | -1.432576192 | -4.196491617 |
| 1 | 6.117585550  | -0.703422513 | -0.238979258 |
| 1 | 1.103372244  | 2.395373106  | 6.131839500  |
| 1 | -1.774840325 | -0.478774357 | -9.584742008 |
| 1 | 2.939631900  | -2.970431446 | -3.279571385 |
| 1 | 6.412114203  | -0.537822195 | -2.695537873 |
| 1 | 4.402799647  | -2.243630225 | 0.679000107  |
| 1 | -3.785483184 | 2.418546993  | 6.887041803  |
| 1 | -0.608997492 | 0.998037324  | -5.008881666 |
| 1 | -2.410428260 | 4.338295325  | 7.621265157  |
| 1 | 1.021600621  | 1.270335112  | -6.855746936 |
| 1 | 0.061829154  | 4.184370553  | 7.498009190  |
| 1 | 0.534622668  | 0.261305897  | -9.066652737 |
| 1 | -2.749029495 | 0.627176245  | 5.508588023  |
| 1 | -2.922852925 | 0.264800599  | -5.531035975 |
| 1 | -1.542477773 | -0.527864597 | 7.336681946  |
| 1 | -2.430286124 | -2.140959194 | -5.880306811 |
| 1 | 2.417852391  | -0.844363993 | 0.209260178  |

|   |              |              |              |
|---|--------------|--------------|--------------|
| 1 | 2.379331673  | -0.568811930 | -3.515918560 |
| 1 | 5.029580462  | 1.166220318  | -1.545089030 |
| 1 | 0.292591637  | 4.537225140  | 5.056478556  |
| 1 | -1.114481286 | 1.940899797  | -9.841205401 |
| 1 | 5.202706216  | -3.836679965 | -3.961091757 |
| 1 | 7.502503048  | -2.404485526 | -1.394052527 |
| 1 | 4.626454439  | -4.536810546 | -0.339291717 |
| 1 | 3.852907333  | 0.161452583  | 0.444392273  |
| 1 | 1.553121366  | -1.280239389 | -2.121220825 |
| 1 | 4.424960826  | 0.860486512  | -3.177657640 |
| 1 | -2.989145003 | 0.280278753  | 7.947417830  |
| 1 | -1.272387285 | -1.424616044 | -4.751760840 |
| 1 | -1.158079765 | 5.334182996  | 5.672463764  |
| 1 | 0.037508112  | 2.664679927  | -8.716369105 |
| 1 | 6.638274223  | -2.836558530 | -3.722685544 |
| 1 | 6.676408875  | -3.105758729 | -0.000305392 |
| 1 | 4.024060778  | -4.841188204 | -1.971996960 |
| 1 | 0.870930982  | 2.040432826  | 8.573471286  |
| 1 | -0.126646581 | -2.163691550 | -8.814877394 |
| 1 | -1.488357390 | 1.611188286  | 3.567387429  |
| 1 | -3.912907185 | 1.649407940  | -7.389534307 |
| 1 | -1.196756546 | 3.186600622  | 9.451210003  |
| 1 | 1.519553847  | -1.133612407 | -7.205628968 |
| 1 | -3.569691414 | 2.761830464  | 4.443835525  |
| 1 | -2.261804852 | 2.684060651  | -5.777610043 |
| 1 | -2.785515237 | 2.461245573  | 9.193527979  |
| 1 | 1.045656953  | -0.830634366 | -5.531745893 |
| 1 | -3.420796360 | 4.292197316  | 5.312158093  |
| 1 | -0.634580415 | 3.096789379  | -6.334885308 |
| 1 | 0.731811852  | 0.513519268  | 7.698306298  |
| 1 | -1.753042312 | -2.579568495 | -8.268520912 |
| 1 | 0.100793076  | 2.351103915  | 3.818838991  |
| 1 | -3.434969169 | 1.342628749  | -9.060443551 |
| 6 | -0.886641308 | 2.202902328  | 4.266018688  |
| 6 | -3.076806721 | 1.355332386  | -8.029169916 |
| 6 | 4.499542628  | -4.094813477 | -1.330768067 |
| 6 | 5.669024142  | -3.104966931 | -3.297150717 |
| 6 | 6.524050938  | -2.679439639 | -0.994666225 |
| 6 | 0.245148310  | 1.474938199  | 7.880104516  |
| 6 | -0.941169840 | -1.857084709 | -8.155398766 |
| 6 | 2.531103108  | -0.998165414 | -2.521658055 |
| 6 | 4.553219624  | 0.419574244  | -2.185461647 |
| 6 | 3.386442468  | -0.571889242 | -0.218295576 |
| 6 | -2.936004430 | 3.330621189  | 5.132612924  |
| 6 | -1.448332004 | 2.375849008  | -6.440801459 |
| 6 | -1.798719866 | 2.607132917  | 8.748250249  |
| 6 | 0.686003279  | -0.839087146 | -6.564874627 |
| 6 | -0.694935026 | 4.361734531  | 5.491028039  |
| 6 | -0.781046635 | 1.945821862  | -8.801475411 |
| 6 | -1.998581557 | 0.448614462  | 7.518748828  |
| 6 | -1.608463099 | -1.425949024 | -5.793197715 |
| 6 | -1.553952650 | 3.552894505  | 4.521351804  |
| 6 | -1.933975363 | 2.358084849  | -7.888626982 |
| 6 | 5.860019294  | -3.708538578 | -1.907100855 |
| 6 | -1.138149962 | 1.254490701  | 8.489369618  |

|   |              |              |              |
|---|--------------|--------------|--------------|
| 6 | -0.457910211 | -1.840867033 | -6.707454425 |
| 6 | 3.194406261  | 0.030060994  | -1.608194074 |
| 6 | -2.792561468 | 2.570898905  | 6.449205831  |
| 6 | -0.957785989 | 0.983103497  | -6.050640329 |
| 6 | 5.638516341  | -1.439194577 | -0.896078403 |
| 6 | 3.617305503  | -2.852259168 | -1.234350305 |
| 6 | 4.786426251  | -1.862852159 | -3.196830952 |
| 6 | -1.933631548 | 3.369561460  | 7.431827442  |
| 6 | 0.197160699  | 0.553932484  | -6.958388547 |
| 6 | 5.437955589  | -0.822140041 | -2.282701248 |
| 6 | 4.270556307  | -1.812818501 | -0.320550230 |
| 6 | 3.418904447  | -2.236519934 | -2.621546873 |
| 6 | -0.751290535 | 1.442669971  | 5.583733824  |
| 6 | -2.583285598 | -0.035653351 | -7.637106453 |
| 6 | 0.107950817  | 2.240864215  | 6.566128180  |
| 6 | -1.428378262 | -0.463114868 | -8.545471550 |
| 6 | -0.555228293 | 3.599165750  | 6.807809989  |
| 6 | -0.291751948 | 0.552957648  | -8.408830325 |
| 6 | -2.131481494 | 1.212536346  | 6.204189786  |
| 6 | -2.093697836 | -0.032787073 | -6.187352288 |
| 1 | -1.651435094 | 4.105962606  | 3.576375462  |
| 1 | -2.285085642 | 3.357493195  | -8.168897161 |
| 1 | 6.493353896  | -4.598934726 | -1.977831978 |
| 1 | -1.040096142 | 0.707251799  | 9.432598375  |
| 1 | -0.108126985 | -2.840193515 | -6.426844042 |
| 1 | 2.559760557  | 0.923518948  | -1.534532473 |
| 1 | -0.900244191 | -3.152407127 | 2.010165959  |
| 1 | 1.832135011  | -7.216194842 | -3.015547782 |
| 1 | 0.737395634  | 2.221348022  | -1.604867820 |
| 1 | 0.254262663  | -5.289648884 | 2.455238041  |
| 1 | -0.197188123 | -8.635194775 | -3.150823754 |
| 1 | -1.202030425 | 3.316057924  | -2.740715595 |
| 1 | -0.048062525 | -1.863847386 | 6.007639703  |
| 1 | -0.611548678 | -3.792727286 | -2.240097901 |
| 1 | 2.043707235  | 6.032770615  | -0.172174988 |
| 1 | 1.108472074  | -4.007509001 | 6.449028024  |
| 1 | -2.647385882 | -5.214017148 | -2.362968926 |
| 1 | 0.125113943  | 7.121306912  | -1.305554897 |
| 1 | 0.993496040  | -5.821938779 | 4.761315761  |
| 1 | -2.433960827 | -7.566439284 | -3.111049748 |
| 1 | -1.317313636 | 5.779105094  | -2.811157494 |
| 1 | -0.782870826 | -1.325308960 | 3.699367317  |
| 1 | 1.617229113  | -4.863496757 | -2.262048666 |
| 1 | 2.167564879  | 3.557323578  | -0.086313907 |
| 1 | -2.796930915 | -2.785924725 | 3.660673156  |
| 1 | 1.718337393  | -5.334020944 | -4.696608984 |
| 1 | 2.903536531  | 3.175277119  | -2.421775138 |
| 1 | 2.640305550  | -4.890033325 | 3.159232865  |
| 1 | -1.514224199 | -8.500756542 | -1.006350450 |
| 1 | -2.598858440 | 4.572613007  | -1.076616358 |
| 1 | -2.428847705 | -2.258308376 | 5.305574088  |
| 1 | 0.707813141  | -3.921761573 | -4.367739859 |
| 1 | 3.450454140  | 4.744094995  | -1.832384368 |
| 1 | 2.997369487  | -4.364514791 | 4.806531633  |
| 1 | -2.529430618 | -7.093196261 | -0.681336346 |

|   |              |              |              |
|---|--------------|--------------|--------------|
| 1 | -2.058112908 | 6.139815855  | -0.473785637 |
| 1 | -1.399331556 | -6.224188767 | 4.046293507  |
| 1 | -1.109685812 | -7.703330305 | -5.258267311 |
| 1 | 0.084119747  | 4.502864291  | -4.473703352 |
| 1 | 1.099543966  | -1.667681790 | 2.073468429  |
| 1 | 1.743985234  | -6.732549912 | -0.586533059 |
| 1 | 0.074828016  | 2.631356113  | 0.768944301  |
| 1 | -0.891569404 | -5.472283108 | 6.402365361  |
| 1 | -2.551466461 | -5.690008054 | -4.794806537 |
| 1 | 0.866568984  | 6.747818587  | -3.640158587 |
| 1 | 1.608263430  | -0.920933165 | 4.414161119  |
| 1 | 0.301671788  | -4.719010149 | -0.126441773 |
| 1 | 0.765796340  | 4.855372199  | 1.588602550  |
| 1 | -1.319631827 | -3.839540523 | 6.918611106  |
| 1 | -1.800237979 | -4.130264437 | -4.428508898 |
| 1 | 2.250387161  | 6.851704161  | -2.551276879 |
| 1 | 2.381809652  | -2.032129088 | 5.547172327  |
| 1 | -1.460416223 | -4.869981884 | -0.158682737 |
| 1 | -0.093485937 | 6.306618699  | 1.068091579  |
| 1 | -2.174092192 | -5.111952144 | 2.913442246  |
| 1 | 0.649110895  | -7.558017243 | -5.216909650 |
| 1 | 0.924641657  | 3.030914416  | -3.979140864 |
| 1 | 1.530944998  | -3.300579178 | 1.543826732  |
| 1 | 0.994772052  | -8.290967346 | -0.944580782 |
| 1 | -1.373360331 | 2.397522500  | -0.240830418 |
| 6 | 1.176444766  | -2.711635227 | 2.393508192  |
| 6 | 0.892835161  | -7.211928483 | -1.077379992 |
| 6 | -0.464632046 | 3.113068190  | -0.050851405 |
| 6 | -1.467202254 | -5.176828530 | 3.745060873  |
| 6 | -0.276581874 | -7.203908590 | -4.758236247 |
| 6 | 0.613443815  | 4.024672209  | -3.648158954 |
| 6 | 1.674857278  | -1.970112291 | 4.717305271  |
| 6 | -0.533974523 | -5.220326713 | -0.622802332 |
| 6 | 0.241643798  | 5.318385152  | 0.749672142  |
| 6 | -0.968688884 | -4.434490941 | 6.071898681  |
| 6 | -1.702642099 | -5.211764542 | -4.300048928 |
| 6 | 1.382986663  | 6.246193420  | -2.819738083 |
| 6 | 2.279432547  | -4.276832452 | 3.988488241  |
| 6 | -1.590476866 | -7.419047907 | -1.134556585 |
| 6 | -1.717500929 | 5.153277505  | -0.791723661 |
| 6 | -2.071361443 | -2.871357872 | 4.474899258  |
| 6 | 0.780349269  | -5.006141588 | -4.242468215 |
| 6 | 2.567600297  | 4.167317921  | -2.113014715 |
| 6 | 2.169626854  | -2.818954601 | 3.548126876  |
| 6 | -0.412462638 | -6.732322039 | -0.446587016 |
| 6 | -0.981258938 | 4.473668512  | 0.361600892  |
| 6 | -1.960657655 | -4.329143751 | 4.915940796  |
| 6 | -0.397685542 | -5.691530104 | -4.931940355 |
| 6 | 1.834568566  | 4.855418506  | -3.261583716 |
| 6 | 0.304726446  | -2.473777635 | 5.166982739  |
| 6 | -0.529850547 | -4.880048834 | -2.111449641 |
| 6 | 1.169732066  | 5.437687029  | -0.455304779 |
| 6 | 0.400417585  | -3.933484752 | 5.615998120  |
| 6 | -1.707607919 | -5.559667471 | -2.812967424 |
| 6 | 0.446973620  | 6.122597633  | -1.618752310 |

|   |              |              |              |
|---|--------------|--------------|--------------|
| 6 | -0.190849949 | -3.218511542 | 2.847067375  |
| 6 | 0.894106247  | -6.870057842 | -2.566241658 |
| 6 | 0.398046422  | 3.214371660  | -1.288378366 |
| 6 | -0.095489860 | -4.678332168 | 3.295108185  |
| 6 | -0.283111555 | -7.549317957 | -3.270159351 |
| 6 | -0.323741685 | 3.904798390  | -2.448332964 |
| 6 | 0.909681329  | -4.776563615 | 4.444481806  |
| 6 | -1.585654272 | -7.073246459 | -2.622322144 |
| 6 | -0.782485536 | 5.289840143  | -1.990984223 |
| 6 | -0.701604168 | -2.374486403 | 4.017318899  |
| 6 | 0.772763857  | -5.357064690 | -2.756436275 |
| 6 | 1.637417651  | 4.053911089  | -0.907348066 |
| 1 | 3.150562503  | -2.456859505 | 3.220563087  |
| 1 | -0.418613623 | -6.978692216 | 0.621587881  |
| 1 | -1.640429287 | 4.388044395  | 1.231924296  |
| 1 | -2.943622882 | -4.686415642 | 5.242241506  |
| 1 | -0.394486610 | -5.443416057 | -5.999446340 |
| 1 | 2.504603870  | 4.942677872  | -4.121593493 |
| 6 | -4.479005675 | 1.183795245  | 1.328062592  |
| 6 | -5.202130551 | 0.822908001  | 0.037466545  |
| 6 | -4.227053001 | 0.159952135  | -0.926776449 |
| 1 | -5.162466843 | 1.680589364  | 2.021067474  |
| 1 | -6.021166165 | 0.135524676  | 0.252571709  |
| 1 | -5.636395405 | 1.717389161  | -0.412453370 |
| 1 | -4.737021232 | -0.089098129 | -1.861696062 |
| 6 | -3.880290530 | -0.061780608 | 1.967877176  |
| 6 | -3.331283880 | 2.171022316  | 0.984896840  |
| 6 | -3.059406874 | 1.137534537  | -1.276590695 |
| 6 | -3.627661927 | -1.100279960 | -0.308286838 |
| 6 | -2.918655722 | -0.723722310 | 0.990521900  |
| 1 | -3.359295715 | 0.196545619  | 2.892781042  |
| 1 | -4.676399243 | -0.760882989 | 2.228539176  |
| 6 | -2.449047366 | 1.429910978  | 0.046929473  |
| 1 | -3.758270200 | 3.065542321  | 0.530490467  |
| 1 | -2.812757910 | 2.446752486  | 1.903415009  |
| 6 | -2.103036569 | 0.450905790  | -2.248462086 |
| 1 | -3.485947097 | 2.036902484  | -1.728790883 |
| 6 | -2.654296782 | -1.773320917 | -1.273045804 |
| 1 | -4.437602068 | -1.797896043 | -0.077830719 |
| 6 | -1.756195514 | 0.255390349  | 0.643545146  |
| 1 | -2.472856342 | -1.611551097 | 1.447905840  |
| 6 | -1.522707771 | -0.804331032 | -1.604158791 |
| 1 | -2.643201657 | 0.187426807  | -3.158815087 |
| 1 | -1.300782022 | 1.134449088  | -2.530662205 |
| 1 | -2.250722626 | -2.677670368 | -0.815818143 |
| 1 | -3.174573881 | -2.066900138 | -2.185850568 |
| 6 | -0.788212989 | -0.426952206 | -0.320499863 |
| 1 | -1.242816012 | 0.522917752  | 1.572222687  |
| 1 | -0.823684236 | -1.279131919 | -2.298892194 |
| 1 | 0.049042421  | 0.238175894  | -0.540106612 |
| 1 | -0.383633775 | -1.323658338 | 0.151178100  |
| 1 | -5.851599278 | 7.354424282  | -4.017173826 |
| 6 | -5.955638015 | 6.263879773  | -3.989411051 |
| 1 | -5.332232185 | 0.904861904  | 6.398287643  |
| 6 | -6.219484122 | 0.374776602  | 6.766154294  |

|   |              |              |              |
|---|--------------|--------------|--------------|
| 1 | -6.065027538 | 6.082254723  | -6.135335111 |
| 6 | -6.661729542 | 5.791694458  | -5.262823615 |
| 1 | -5.095323088 | -1.361508913 | 7.376924593  |
| 6 | -5.951475917 | -1.131271013 | 6.731539992  |
| 6 | -6.930318603 | 4.346208013  | -2.740100154 |
| 1 | -7.525448252 | 4.055192613  | -1.864701927 |
| 1 | -9.496046787 | 0.184353337  | 5.722193356  |
| 6 | -8.640589809 | -0.045388830 | 6.369013613  |
| 1 | -7.738894936 | 2.780756295  | -3.983210416 |
| 6 | -7.636112526 | 3.872240323  | -4.012166748 |
| 1 | -9.259075584 | -2.084809349 | 6.692745842  |
| 6 | -8.371669992 | -1.551730407 | 6.334037725  |
| 1 | -7.275079142 | 3.918232341  | -6.137129208 |
| 6 | -6.783929042 | 4.266397957  | -5.221558091 |
| 1 | -6.998944981 | -2.944497032 | 7.243743443  |
| 6 | -7.188776390 | -1.864609039 | 7.253893331  |
| 1 | -6.309808829 | 6.214039302  | -1.862815847 |
| 6 | -6.805930316 | 5.870200387  | -2.779136662 |
| 1 | -7.592872750 | 1.767926035  | 5.858563776  |
| 6 | -7.402780472 | 0.687295057  | 5.847697920  |
| 6 | -8.191092004 | 6.505303039  | -2.874442465 |
| 1 | -8.099155798 | 7.593654958  | -2.885805283 |
| 1 | -6.202552876 | 0.780731373  | 4.058037381  |
| 6 | -7.085440210 | 0.245510125  | 4.420888397  |
| 1 | -4.801558003 | 3.907345594  | -5.997055384 |
| 6 | -5.398049407 | 3.630682123  | -5.124511689 |
| 1 | -6.656958979 | -1.659121558 | 9.335515459  |
| 6 | -7.498834089 | -1.419528871 | 8.681545924  |
| 1 | -8.786993266 | 6.228019508  | -2.001056726 |
| 1 | -7.921374655 | 0.490959117  | 3.760999315  |
| 1 | -5.490516152 | 2.541226484  | -5.112902080 |
| 1 | -8.374399895 | -1.955342061 | 9.054108606  |
| 1 | -8.538946625 | 6.100933312  | -6.280270566 |
| 6 | -8.045923471 | 6.429469750  | -5.362833965 |
| 1 | -5.422999557 | -2.645969714 | 5.289136286  |
| 6 | -5.635651372 | -1.574698502 | 5.305069541  |
| 1 | -4.066524769 | 5.983186755  | -2.981293900 |
| 6 | -4.568827567 | 5.630681059  | -3.886952900 |
| 1 | -6.700607830 | 1.901989150  | 8.214396521  |
| 6 | -6.526164428 | 0.823192411  | 8.192787539  |
| 1 | -9.524485740 | 4.154966821  | -5.014697788 |
| 6 | -9.021232309 | 4.507158876  | -4.111648983 |
| 1 | -7.885854762 | -3.076129964 | 4.886576189  |
| 6 | -8.061391323 | -1.997443868 | 4.906857937  |
| 1 | -5.057621639 | 4.039048537  | -1.717518364 |
| 6 | -5.546892274 | 3.707715564  | -2.640433459 |
| 1 | -9.156706179 | 1.475341689  | 7.811289927  |
| 6 | -8.951620530 | 0.402137096  | 7.795717590  |
| 1 | -9.629604805 | 4.210548429  | -3.253601691 |
| 1 | -8.914253478 | -1.784118627 | 4.258060373  |
| 1 | -5.652108860 | 2.618736072  | -2.607969396 |
| 1 | -9.843116121 | -0.113697809 | 8.158467922  |
| 1 | -7.950104604 | 7.516636070  | -5.405737879 |
| 1 | -4.744076348 | -1.053214467 | 4.945792800  |
| 1 | -3.961050512 | 5.926538274  | -4.745073644 |

|   |              |              |              |
|---|--------------|--------------|--------------|
| 1 | -5.672723448 | 0.609101137  | 8.841389096  |
| 6 | -4.706289281 | 4.110419520  | -3.850390303 |
| 6 | -7.762908837 | 0.084806473  | 8.701104452  |
| 6 | -8.882666728 | 6.027525602  | -4.149885157 |
| 6 | -6.824877940 | -1.258730857 | 4.400427931  |
| 1 | -3.708702794 | 3.653618404  | -3.779869319 |
| 1 | -7.985699227 | 0.404995108  | 9.724321869  |
| 1 | -9.875194396 | 6.483993561  | -4.220843200 |
| 1 | -6.604745323 | -1.579226657 | 3.373107523  |
| 1 | -9.038209025 | -2.146200948 | -3.520819239 |
| 6 | -8.104483541 | -2.499166163 | -3.974498080 |
| 1 | -6.953026783 | -6.397942325 | 3.607894894  |
| 6 | -6.642809860 | -5.981093255 | 2.643019892  |
| 1 | -5.064077037 | 4.073739425  | 2.725951440  |
| 6 | -5.978584444 | 4.680894056  | 2.678648823  |
| 1 | -6.866120850 | -1.603036275 | -2.452617577 |
| 6 | -6.956738061 | -1.580443932 | -3.547909924 |
| 1 | -8.329324864 | -4.640461534 | 2.524899281  |
| 6 | -7.870562147 | -5.428445623 | 1.914758918  |
| 1 | -6.091884790 | 4.613838328  | 0.524339639  |
| 6 | -6.055601821 | 5.374334292  | 1.316693160  |
| 1 | -7.033748574 | -2.944470896 | -7.214751086 |
| 6 | -6.941601952 | -2.963364275 | -6.123000818 |
| 1 | -5.111137241 | -7.276056974 | -0.155219988 |
| 6 | -5.571026279 | -6.491019430 | 0.456602135  |
| 1 | -7.170116089 | 7.342162850  | 4.508395049  |
| 6 | -7.199847767 | 6.584210866  | 3.717712570  |
| 1 | -4.861749670 | -2.396348694 | -6.154927790 |
| 6 | -5.794952744 | -2.043427245 | -5.699388016 |
| 1 | -6.481391224 | -5.524618123 | -1.237419386 |
| 6 | -6.797652074 | -5.940074871 | -0.273075131 |
| 1 | -8.184288901 | 7.889244153  | 2.312032003  |
| 6 | -7.275963205 | 7.278488138  | 2.355673011  |
| 1 | -4.824198490 | -1.444172911 | -3.873990631 |
| 6 | -5.658644051 | -2.094004789 | -4.175810087 |
| 1 | -8.296898748 | -4.422061717 | 0.058097619  |
| 6 | -7.422712547 | -4.832375810 | 0.578753428  |
| 1 | -7.404258666 | 6.701741010  | 0.283111541  |
| 6 | -7.335621301 | 6.211224689  | 1.260959936  |
| 1 | -9.070016904 | -3.094038974 | -5.805929355 |
| 6 | -8.240219619 | -2.448694518 | -5.497235536 |
| 1 | -5.146098948 | -7.498666459 | 2.315294740  |
| 6 | -6.018710760 | -7.089577641 | 1.791866306  |
| 1 | -5.850277655 | 5.256318926  | 4.750580773  |
| 6 | -5.918767262 | 5.748928774  | 3.773164839  |
| 1 | -9.453578454 | -0.663193656 | -5.505911306 |
| 6 | -8.519991949 | -1.016903065 | -5.950019735 |
| 1 | -7.338870947 | -8.637492178 | 2.508771333  |
| 6 | -7.034461476 | -8.204698250 | 1.553604546  |
| 1 | -3.782269512 | 6.045399518  | 3.625720514  |
| 6 | -4.696728893 | 6.643172374  | 3.570121115  |
| 1 | -5.275451450 | -3.547770329 | -2.624125894 |
| 6 | -5.380354638 | -3.522657374 | -3.713496242 |
| 1 | -6.868031957 | -2.920845599 | 1.410775820  |
| 6 | -6.409331096 | -3.714876434 | 0.814653221  |



|   |              |              |              |
|---|--------------|--------------|--------------|
| 1 | -8.596378594 | 4.562893109  | 0.669884648  |
| 6 | -8.555121059 | 5.314802197  | 1.461366904  |
| 1 | -8.632317822 | -0.985846826 | -7.035723225 |
| 1 | -6.578788580 | -8.998259963 | 0.957209207  |
| 1 | -4.653336044 | 7.394688027  | 4.360982649  |
| 1 | -4.443844946 | -3.879806697 | -4.148166923 |
| 1 | -6.110627628 | -3.286128084 | -0.148053194 |
| 1 | -9.467049097 | 5.912095163  | 1.402935154  |
| 1 | -6.408708493 | 0.504468988  | -3.687113515 |
| 6 | -7.229861115 | -0.148621699 | -4.002126019 |
| 1 | -9.767064568 | -6.136030462 | 1.168894757  |
| 6 | -8.888606638 | -6.541222255 | 1.676857380  |
| 1 | -4.876649614 | 6.742184498  | 0.130732419  |
| 6 | -4.831773818 | 6.264545626  | 1.112990990  |
| 1 | -8.659956476 | -4.577041285 | -3.808377603 |
| 6 | -7.832272037 | -3.928655065 | -3.513786882 |
| 1 | -4.758123565 | -5.262855255 | 3.412728587  |
| 6 | -5.626549719 | -4.866835857 | 2.881080625  |
| 1 | -7.129753718 | 3.279158597  | 3.848155765  |
| 6 | -7.197621359 | 3.783530547  | 2.881557088  |
| 1 | -5.239127031 | 0.035924990  | -5.866505041 |
| 6 | -6.070274230 | -0.612396389 | -6.156672556 |
| 1 | -8.679348141 | -6.653933822 | -1.048994056 |
| 6 | -7.814298537 | -7.052813358 | -0.514077683 |
| 6 | -6.056431514 | 8.174430785  | 2.148442652  |
| 1 | -6.125064055 | 8.676037541  | 1.180201959  |
| 1 | -7.477201341 | -5.049252514 | -5.981657895 |
| 6 | -6.663371687 | -4.394024663 | -5.664603633 |
| 1 | -3.673932028 | -5.776873036 | 1.196135918  |
| 6 | -4.554909692 | -5.374489040 | 0.688977092  |
| 1 | -8.367325571 | 5.207434209  | 4.902073410  |
| 6 | -8.420619243 | 5.688989273  | 3.922734000  |
| 1 | -6.151855761 | -0.579768613 | -7.244936292 |
| 1 | -7.367771452 | -7.832767426 | -1.134935126 |
| 1 | -6.025213160 | 8.944114186  | 2.922268838  |
| 1 | -5.741873692 | -4.758277179 | -6.125288661 |
| 1 | -4.232085012 | -4.961191745 | -0.271990506 |
| 1 | -9.330324224 | 6.292130521  | 3.896033223  |
| 1 | -8.146479512 | 0.218486250  | -3.536315857 |
| 1 | -9.215653085 | -6.953204622 | 2.634119382  |
| 1 | -3.921318885 | 5.658495534  | 1.152459551  |
| 1 | -7.757945546 | -3.957040638 | -2.423947767 |
| 1 | -6.072250239 | -4.084623034 | 3.499102406  |
| 1 | -7.230587673 | 3.015767464  | 2.101936615  |
| 6 | -6.533301336 | -4.427694461 | -4.143291616 |
| 6 | -5.189944536 | -4.278780671 | 1.541600464  |
| 6 | -8.467301999 | 4.630256066  | 2.823555484  |
| 6 | -7.366300659 | -0.113052824 | -5.522701436 |
| 6 | -8.252907235 | -7.639412623 | 0.826078431  |
| 6 | -4.786989425 | 7.328142892  | 2.208112856  |
| 1 | -6.335225109 | -5.454079548 | -3.814681943 |
| 1 | -4.457774531 | -3.478552748 | 1.718076028  |
| 1 | -9.342626269 | 3.987546404  | 2.968940944  |
| 1 | -7.563878474 | 0.914135865  | -5.850380013 |
| 1 | -8.981759721 | -8.438681167 | 0.655695964  |

|   |               |              |              |
|---|---------------|--------------|--------------|
| 1 | -3.910249815  | 7.969304499  | 2.060598631  |
| 6 | -9.962427407  | -1.292176182 | 1.214879700  |
| 6 | -10.921860254 | -1.875310575 | 0.180472686  |
| 6 | -11.472712765 | -0.749997835 | -0.693304097 |
| 1 | -9.565820788  | -2.099145286 | 1.842419480  |
| 1 | -10.398961607 | -2.606267693 | -0.442053656 |
| 1 | -11.742456702 | -2.390641661 | 0.683875891  |
| 1 | -12.160958561 | -1.172236981 | -1.434448263 |
| 6 | -8.810077903  | -0.591730157 | 0.498444387  |
| 6 | -10.706117965 | -0.279735639 | 2.083569025  |
| 6 | -12.220938450 | 0.273044964  | 0.164627149  |
| 6 | -10.327749758 | -0.039845568 | -1.418322395 |
| 6 | -9.360555752  | 0.531030392  | -0.378837861 |
| 1 | -8.115831305  | -0.180514444 | 1.238318992  |
| 1 | -8.266432953  | -1.311799206 | -0.119735586 |
| 6 | -11.253917869 | 0.843370545  | 1.204860954  |
| 1 | -11.526866999 | -0.772989715 | 2.608777638  |
| 1 | -10.030593058 | 0.136671496  | 2.836111592  |
| 6 | -12.771874654 | 1.394530312  | -0.713911220 |
| 1 | -13.050865756 | -0.224740867 | 0.678762543  |
| 6 | -10.875653765 | 1.078914056  | -2.301712983 |
| 1 | -9.793574145  | -0.768023795 | -2.040044893 |
| 6 | -10.108862383 | 1.553702641  | 0.478602723  |
| 1 | -8.529097289  | 1.029916277  | -0.895653002 |
| 1 | -11.784803242 | 1.567687840  | 1.833554579  |
| 6 | -11.619615545 | 2.091554414  | -1.433749603 |
| 1 | -13.472007301 | 0.983204894  | -1.444318827 |
| 1 | -13.315604755 | 2.114567105  | -0.098195053 |
| 1 | -10.057056297 | 1.574897036  | -2.831224654 |
| 1 | -11.552667896 | 0.661607572  | -3.050506693 |
| 6 | -10.656132208 | 2.674741166  | -0.402480652 |
| 1 | -9.420139693  | 1.978126384  | 1.220456960  |
| 1 | -12.013286564 | 2.896305759  | -2.064478640 |
| 1 | -11.170722194 | 3.414305519  | 0.214882327  |
| 1 | -9.831332384  | 3.179880751  | -0.913782305 |

---

**CL19**

|   |              |              |              |
|---|--------------|--------------|--------------|
| 1 | -0.693050675 | 2.068312831  | 6.036399812  |
| 1 | -2.688886346 | 0.244499457  | -6.883444992 |
| 1 | 4.759402198  | 0.334177766  | -1.638958359 |
| 1 | 4.609643879  | -3.189711492 | 0.786837066  |
| 1 | 1.984404123  | -2.790396041 | -2.571313037 |
| 1 | -1.447342730 | 4.436767083  | 6.133328024  |
| 1 | -0.902634627 | 0.675359856  | -8.544776248 |
| 1 | 5.722674935  | -1.059347523 | 0.169040893  |
| 1 | 2.942697708  | -4.180871301 | -0.759486499 |
| 1 | 3.095360166  | -0.658692436 | -3.187002555 |
| 1 | -1.667876493 | 1.591155128  | 10.174865392 |
| 1 | 0.212743382  | 0.337796935  | -3.734791959 |
| 1 | -2.414412908 | 3.955093151  | 10.274889788 |
| 1 | 1.998685472  | 0.756766664  | -5.395034430 |
| 1 | -2.018493984 | 5.436338543  | 8.326264458  |
| 1 | 1.467795018  | 0.636078159  | -7.813075239 |
| 1 | -1.093668055 | 0.590206488  | 7.984143113  |
| 1 | -2.162097731 | 0.380525859  | -4.465391205 |
| 1 | 1.134853115  | 1.646093112  | 7.709207815  |

---

|   |              |              |              |
|---|--------------|--------------|--------------|
| 1 | -2.207051414 | -1.841835960 | -5.560554033 |
| 1 | 2.285996870  | 0.694942814  | -1.285738026 |
| 1 | 3.778011905  | -0.986732909 | 1.704265101  |
| 1 | 1.058778027  | -2.663785301 | -0.226279449 |
| 1 | -3.844314351 | 4.581620915  | 6.887610363  |
| 1 | 0.292258239  | 2.809707917  | -8.025024269 |
| 1 | 6.559575294  | -3.258219830 | -0.741473282 |
| 1 | 3.867031104  | -4.306556479 | -3.104309812 |
| 1 | 5.564408255  | -1.017110486 | -3.558111066 |
| 1 | 1.144079632  | -0.603908575 | -1.659161214 |
| 1 | 3.845000916  | 0.464903696  | 0.697715502  |
| 1 | 2.147574640  | -2.828054728 | 1.156661583  |
| 1 | 0.734819228  | 1.443240356  | 9.417253481  |
| 1 | -1.006800294 | -1.811774066 | -4.266213947 |
| 1 | -4.245294246 | 4.381387971  | 8.596478624  |
| 1 | 1.501035095  | 2.870566897  | -6.744219291 |
| 1 | 5.413396932  | -4.545051671 | -1.126357256 |
| 1 | 3.930931508  | -2.850568896 | -4.103846795 |
| 1 | 6.647352663  | -1.177237706 | -2.172627129 |
| 1 | 0.381766648  | 5.296559605  | 7.572412655  |
| 1 | 0.249340052  | -1.512121821 | -8.352625355 |
| 1 | -2.930441419 | 1.019116609  | 6.286597491  |
| 1 | -2.658450652 | 2.466276694  | -5.780688852 |
| 1 | -0.187888727 | 5.011753007  | 10.013362682 |
| 1 | 1.957677067  | -1.461493135 | -6.499100938 |
| 1 | -3.488560139 | 0.726860909  | 8.735397723  |
| 1 | -0.927338604 | 2.531786330  | -3.923552528 |
| 1 | -0.044039114 | 3.424892144  | 10.773181154 |
| 1 | 1.439331072  | -1.586153660 | -4.817467509 |
| 1 | -4.041204186 | 2.112285549  | 9.681425433  |
| 1 | 0.785393089  | 2.678850732  | -4.330286846 |
| 1 | 0.934184816  | 3.907486828  | 6.629622638  |
| 1 | -1.466681370 | -1.668915260 | -7.968463601 |
| 1 | -3.075628712 | 2.617935046  | 5.539855812  |
| 1 | -2.140574894 | 2.592409478  | -7.462799293 |
| 6 | -2.809003164 | 2.091928547  | 6.462810198  |
| 6 | -1.864954780 | 2.194985593  | -6.483542039 |
| 6 | 5.646122780  | -1.409770601 | -2.541937581 |
| 6 | 5.558642157  | -3.462360330 | -1.127918986 |
| 6 | 4.030617131  | -3.226698231 | -3.082974006 |
| 6 | 0.261637811  | 4.219695067  | 7.433327541  |
| 6 | -0.521595930 | -1.237204660 | -7.629941670 |
| 6 | 3.679696437  | -0.616039378 | 0.680797273  |
| 6 | 2.062629691  | -2.435004467 | 0.141551245  |
| 6 | 2.146105239  | -0.389672876 | -1.273930886 |
| 6 | -3.371388834 | 1.804915886  | 8.875355877  |
| 6 | -0.165852726 | 2.249435106  | -4.655550292 |
| 6 | -0.303911628 | 3.938694124  | 9.845257016  |
| 6 | 1.166440626  | -1.187278323 | -5.798039056 |
| 6 | -3.576237299 | 4.045308169  | 7.801413126  |
| 6 | 0.549462695  | 2.421303028  | -7.036939626 |
| 6 | 0.464969039  | 1.981054269  | 8.506091876  |
| 6 | -1.252577819 | -1.408800801 | -5.252811570 |
| 6 | -3.736474465 | 2.541724039  | 7.589143619  |
| 6 | -0.536511477 | 2.798708655  | -6.032291187 |

|   |              |              |              |
|---|--------------|--------------|--------------|
| 6 | 5.428588266  | -2.921380351 | -2.550161171 |
| 6 | 0.625108127  | 3.484490255  | 8.721767786  |
| 6 | -0.161979022 | -1.786875623 | -6.252059161 |
| 6 | 2.281556208  | -0.923966679 | 0.150199936  |
| 6 | -1.925598086 | 2.121469027  | 9.251307387  |
| 6 | -0.048570795 | 0.728192434  | -4.727416059 |
| 6 | 2.987771771  | -2.566112439 | -2.185834124 |
| 6 | 4.600424541  | -0.751492134 | -1.645138442 |
| 6 | 4.513485210  | -2.799392168 | -0.233396537 |
| 6 | -1.750279345 | 3.626323335  | 9.467590436  |
| 6 | 1.042332925  | 0.333299594  | -5.724432147 |
| 6 | 3.105977997  | -3.097063253 | -0.755770414 |
| 6 | 3.193584430  | -1.050504893 | -2.167115176 |
| 6 | 4.721169450  | -1.282915824 | -0.215365155 |
| 6 | -1.361501211 | 2.400096401  | 6.842186002  |
| 6 | -1.735184713 | 0.675193868  | -6.557733563 |
| 6 | -1.185392435 | 3.905262750  | 7.058540330  |
| 6 | -0.642632302 | 0.283154815  | -7.554617427 |
| 6 | -2.128909542 | 4.356060645  | 8.176759814  |
| 6 | 0.681362006  | 0.900931672  | -7.099103970 |
| 6 | -0.983105282 | 1.670451347  | 8.133481127  |
| 6 | -1.373856643 | 0.111711501  | -5.181680898 |
| 1 | -4.774022459 | 2.315772447  | 7.318627234  |
| 1 | -0.626991672 | 3.889653531  | -5.978286954 |
| 1 | 6.177454022  | -3.395953830 | -3.193012981 |
| 1 | 1.663110271  | 3.708244048  | 8.989928531  |
| 1 | -0.075223091 | -2.877384387 | -6.304085178 |
| 1 | 1.533485556  | -0.448996756 | 0.800535549  |
| 1 | -0.291487103 | -1.978070342 | 2.622636817  |
| 1 | 0.323672569  | -6.923965407 | -4.558255671 |
| 1 | 0.372657403  | 1.889435865  | -0.124604146 |
| 1 | 1.713987521  | -3.169196823 | 3.440737037  |
| 1 | -0.704648010 | -8.428540638 | -2.878489190 |
| 1 | -1.332177849 | 3.704515503  | -0.371878165 |
| 1 | -2.519534698 | -3.442348413 | 5.979469384  |
| 1 | -2.438990496 | -3.835727479 | -3.489920495 |
| 1 | 2.373623423  | 4.185155675  | 2.873042830  |
| 1 | -0.507559512 | -4.644068720 | 6.786807632  |
| 1 | -3.463634720 | -5.335796995 | -1.806494954 |
| 1 | 0.697591729  | 5.994216180  | 2.620152323  |
| 1 | 1.512964326  | -4.731978851 | 5.350274099  |
| 1 | -2.781377878 | -7.721491254 | -1.723337795 |
| 1 | -0.975696680 | 5.853386120  | 0.796987395  |
| 1 | -2.321233928 | -1.876596964 | 4.079929441  |
| 1 | -0.356672869 | -4.542707256 | -4.638761105 |
| 1 | 2.027150857  | 2.026066874  | 1.707218274  |
| 1 | -2.209641762 | -3.576232931 | 2.262415758  |
| 1 | -1.400689334 | -6.131593002 | -6.232247453 |
| 1 | 2.673884364  | 2.766217411  | -0.569191481 |
| 1 | 2.319930430  | -2.426822038 | 5.768851017  |
| 1 | -0.607342166 | -7.397319665 | -0.577546419 |
| 1 | -2.462948635 | 4.178683908  | 1.829582147  |
| 1 | -3.127044448 | -4.180478688 | 3.651632112  |
| 1 | -2.536281158 | -4.858733419 | -5.780697767 |
| 1 | 3.507184903  | 3.710914287  | 0.663418650  |

|   |              |              |              |
|---|--------------|--------------|--------------|
| 1 | 1.402535587  | -3.029543041 | 7.150915177  |
| 1 | -1.747844044 | -6.125332349 | -0.133116552 |
| 1 | -1.617450343 | 5.098984113  | 3.073862388  |
| 1 | 0.908174869  | -5.475460172 | 3.012074024  |
| 1 | -2.876223272 | -8.758731220 | -4.027421908 |
| 1 | 0.149054888  | 5.376914989  | -1.418205086 |
| 1 | -0.417480880 | -0.262694747 | 4.432041819  |
| 1 | 1.361891006  | -5.319465161 | -2.979234151 |
| 1 | -0.233430342 | 1.139463659  | 2.177397744  |
| 1 | -0.400353360 | -6.345528693 | 4.985658623  |
| 1 | -4.501563987 | -6.946247831 | -3.389035434 |
| 1 | 1.344507423  | 6.736998638  | 0.346352230  |
| 1 | -1.721973604 | -1.135430924 | 6.392328422  |
| 1 | -0.271205167 | -3.500754471 | -2.334758977 |
| 1 | 0.901240851  | 2.498000011  | 3.919148131  |
| 1 | -2.062149902 | -5.810549657 | 5.247542231  |
| 1 | -4.368401715 | -5.341093487 | -4.117854132 |
| 1 | 2.727942871  | 6.051402087  | 1.199428531  |
| 1 | -0.972569904 | -2.269884065 | 7.520247648  |
| 1 | -1.556052057 | -3.850154283 | -1.168551468 |
| 1 | 0.330385462  | 4.129586792  | 4.284148722  |
| 1 | 0.161470501  | -4.335678536 | 1.890520923  |
| 1 | -1.593419986 | -8.424721853 | -5.193053560 |
| 1 | 0.698192252  | 3.743058995  | -1.792771965 |
| 1 | 1.250238179  | -0.794277043 | 4.163188741  |
| 1 | 1.226815512  | -6.922388017 | -2.249653892 |
| 1 | -1.688369687 | 1.722729328  | 1.322797608  |
| 6 | 0.267436340  | -1.113544314 | 4.520866148  |
| 6 | 0.653474616  | -6.065671752 | -2.610717387 |
| 6 | -0.654185347 | 2.060332109  | 1.764740708  |
| 6 | 0.214173592  | -4.635914736 | 2.940516879  |
| 6 | -2.183999789 | -7.991808411 | -4.382520877 |
| 6 | 0.580455196  | 4.471667847  | -0.987136961 |
| 6 | -1.023587596 | -1.973225027 | 6.470824050  |
| 6 | -0.960058529 | -4.273994512 | -1.983029744 |
| 6 | 0.470763296  | 3.402522591  | 3.483336323  |
| 6 | -1.078420560 | -5.495108313 | 4.892025125  |
| 6 | -3.794620452 | -6.197472125 | -3.755515954 |
| 6 | 1.759964078  | 5.813747694  | 0.754596682  |
| 6 | 1.323850704  | -2.723901699 | 6.105820262  |
| 6 | -1.156329910 | -6.533426335 | -0.957824368 |
| 6 | -1.482529953 | 4.370382192  | 2.272224971  |
| 6 | -2.132246972 | -3.884015865 | 3.310167833  |
| 6 | -1.987226952 | -5.725969566 | -5.405032635 |
| 6 | 2.530307243  | 3.504676694  | 0.222147438  |
| 6 | 0.359295911  | -1.546474913 | 5.983168175  |
| 6 | -0.176314588 | -5.480081290 | -1.470596795 |
| 6 | -0.893118345 | 3.085417719  | 2.851662821  |
| 6 | -1.167972543 | -5.062286448 | 3.430568076  |
| 6 | -2.964447657 | -6.783125902 | -4.895195190 |
| 6 | 1.937290645  | 4.784898670  | -0.360122295 |
| 6 | -1.526173730 | -3.141838608 | 5.626554844  |
| 6 | -1.880524747 | -4.706029059 | -3.122211927 |
| 6 | 1.402853646  | 3.966787142  | 2.416431906  |
| 6 | -0.569467539 | -4.330167114 | 5.739110010  |

|   |              |              |              |
|---|--------------|--------------|--------------|
| 6 | -2.867260375 | -5.762989458 | -2.622849052 |
| 6 | 0.822798976  | 5.253698938  | 1.823005132  |
| 6 | -0.236101097 | -2.283394439 | 3.676965343  |
| 6 | -0.274266695 | -6.500802011 | -3.743042317 |
| 6 | 0.223411420  | 2.627599548  | 0.671081167  |
| 6 | 0.720323297  | -3.472884905 | 3.792088098  |
| 6 | -1.261597408 | -7.558317158 | -3.244623813 |
| 6 | -0.357073545 | 3.917116995  | 0.083462806  |
| 6 | 0.816492234  | -3.891186047 | 5.260647716  |
| 6 | -2.080089924 | -6.965026700 | -2.095468591 |
| 6 | -0.542872472 | 4.935903991  | 1.209879616  |
| 6 | -1.621620484 | -2.721920631 | 4.158188439  |
| 6 | -1.060314188 | -5.298341958 | -4.269476536 |
| 6 | 1.598919158  | 2.947092303  | 1.295549344  |
| 1 | 0.721053337  | -0.709627460 | 6.590629985  |
| 1 | 0.487797022  | -5.169403049 | -0.655243278 |
| 1 | -1.554602235 | 2.682039323  | 3.625033155  |
| 1 | -1.531457033 | -5.897543583 | 2.821922810  |
| 1 | -3.628099239 | -7.092531323 | -5.709878561 |
| 1 | 2.610028261  | 5.182700817  | -1.124675502 |
| 6 | -5.183066921 | 0.806260979  | 2.088328924  |
| 6 | -5.766555151 | 1.225261046  | 0.745683280  |
| 6 | -4.840492889 | 0.780379219  | -0.377891089 |
| 1 | -5.838576846 | 1.120512727  | 2.905186363  |
| 1 | -6.747728606 | 0.767245636  | 0.611599058  |
| 1 | -5.905884839 | 2.308838007  | 0.712330294  |
| 1 | -5.254728500 | 1.080995337  | -1.344920603 |
| 6 | -4.973511212 | -0.701017472 | 2.134874755  |
| 6 | -3.808567170 | 1.504203903  | 2.265401200  |
| 6 | -3.453807005 | 1.480632601  | -0.221213521 |
| 6 | -4.624069275 | -0.731619351 | -0.351582013 |
| 6 | -4.042686514 | -1.120429754 | 1.005467699  |
| 1 | -4.555432171 | -0.992953583 | 3.100600903  |
| 1 | -5.932314277 | -1.210987878 | 2.026144775  |
| 6 | -2.986901196 | 1.033989979  | 1.119159428  |
| 1 | -3.956833772 | 2.584216979  | 2.259705631  |
| 1 | -3.380566016 | 1.208182044  | 3.223993667  |
| 6 | -2.539619739 | 1.038435633  | -1.362365432 |
| 1 | -3.615076404 | 2.562731926  | -0.251980832 |
| 6 | -3.688081286 | -1.166325713 | -1.477656007 |
| 1 | -5.589903882 | -1.231186312 | -0.480209675 |
| 6 | -2.660083093 | -0.416801295 | 1.165337713  |
| 1 | -3.872343513 | -2.200303716 | 1.044929283  |
| 6 | -2.338535683 | -0.473638713 | -1.308998017 |
| 1 | -2.996326040 | 1.319939886  | -2.312143503 |
| 1 | -1.578427659 | 1.549621148  | -1.297269261 |
| 1 | -3.560648626 | -2.250015589 | -1.456488628 |
| 1 | -4.121664380 | -0.904484154 | -2.443364106 |
| 6 | -1.730385837 | -0.855712274 | 0.037410681  |
| 1 | -2.242625552 | -0.697299963 | 2.136086298  |
| 1 | -1.668115667 | -0.780999940 | -2.115545371 |
| 1 | -0.751978111 | -0.387318061 | 0.157282080  |
| 1 | -1.584325846 | -1.935684621 | 0.089580025  |
| 1 | -5.310538245 | 4.017610428  | -4.897881293 |
| 6 | -5.557974821 | 4.708067728  | -4.082328422 |

|   |               |              |              |
|---|---------------|--------------|--------------|
| 1 | -5.750292597  | 0.299762713  | 5.673580727  |
| 6 | -6.149920162  | -0.564810274 | 6.221883483  |
| 1 | -5.608455527  | 6.433284731  | -5.371749151 |
| 6 | -5.094711268  | 6.117769841  | -4.457073039 |
| 1 | -6.779103794  | -1.594886947 | 4.432135733  |
| 6 | -7.224580982  | -1.249930533 | 5.374287872  |
| 6 | -5.187041488  | 5.225660369  | -1.675365603 |
| 1 | -4.672022302  | 4.911753769  | -0.755652191 |
| 1 | -7.771434146  | -0.946546054 | 9.234894741  |
| 6 | -7.325480249  | -1.287974633 | 8.294002252  |
| 1 | -4.966800477  | 7.325465935  | -1.234437113 |
| 6 | -4.722418356  | 6.634898159  | -2.050793922 |
| 1 | -8.801807220  | -2.830618465 | 7.994731122  |
| 6 | -8.400653638  | -1.970990076 | 7.445420191  |
| 1 | -5.142008407  | 8.088954425  | -3.584727365 |
| 6 | -5.458885944  | 7.074312146  | -3.318689574 |
| 1 | -8.521568055  | -2.963056313 | 5.533807487  |
| 6 | -7.761826162  | -2.459435264 | 6.143285286  |
| 1 | -5.144378542  | 3.253707582  | -2.545987328 |
| 6 | -4.822903492  | 4.269974676  | -2.813265018 |
| 1 | -6.024869306  | 0.420832482  | 8.135651134  |
| 6 | -6.786581318  | -0.078978503 | 7.526361344  |
| 6 | -3.315253034  | 4.282155285  | -3.052082673 |
| 1 | -3.063240384  | 3.590344399  | -3.859127696 |
| 1 | -7.523213418  | 1.770936149  | 6.691336715  |
| 6 | -7.917010332  | 0.902289807  | 7.225040453  |
| 1 | -7.487110774  | 7.393221095  | -3.983793848 |
| 6 | -6.968028385  | 7.063024560  | -3.081636565 |
| 1 | -6.186668960  | -3.800635702 | 5.516095198  |
| 6 | -6.629464236  | -3.438860124 | 6.447539756  |
| 1 | -2.787105964  | 3.956007094  | -2.151325552 |
| 1 | -8.358631800  | 1.255840756  | 8.159117266  |
| 1 | -7.220866224  | 7.758544898  | -2.277319088 |
| 1 | -7.023746800  | -4.303071361 | 6.986441394  |
| 1 | -3.264573464  | 7.136581214  | -4.977747577 |
| 6 | -3.586145018  | 6.131729238  | -4.696558658 |
| 1 | -9.117757090  | -0.766257072 | 4.458840983  |
| 6 | -8.358213323  | -0.272824239 | 5.070176408  |
| 1 | -7.394773429  | 3.682158013  | -3.597590415 |
| 6 | -7.066890632  | 4.693829439  | -3.848308279 |
| 1 | -4.243812225  | -1.045354978 | 7.114107880  |
| 6 | -5.015950223  | -1.542460466 | 6.521693257  |
| 1 | -2.886262613  | 7.659231965  | -2.534512371 |
| 6 | -3.212695488  | 6.647815264  | -2.284553592 |
| 1 | -10.304381644 | -1.487709038 | 6.551077664  |
| 6 | -9.533547769  | -0.991486452 | 7.144328551  |
| 1 | -7.021656571  | 4.208191975  | -1.151136257 |
| 6 | -6.695275073  | 5.211857140  | -1.438844717 |
| 1 | -5.434037450  | -1.769212579 | 9.216058295  |
| 6 | -6.189750002  | -2.262298182 | 8.599638010  |
| 1 | -2.693122668  | 6.344635877  | -1.370409963 |
| 1 | -9.993041553  | -0.657384304 | 8.076945634  |
| 1 | -6.946702677  | 5.891697923  | -0.621955385 |
| 1 | -6.573946231  | -3.116151290 | 9.161647974  |
| 1 | -3.333417232  | 5.457087340  | -5.518207849 |

|   |              |              |              |
|---|--------------|--------------|--------------|
| 1 | -7.974735122 | 0.582204720  | 4.504696990  |
| 1 | -7.585215107 | 4.995849805  | -4.760620208 |
| 1 | -4.557975535 | -1.881318654 | 5.587335643  |
| 6 | -7.415739083 | 5.650826713  | -2.711347620 |
| 6 | -5.565095640 | -2.741482966 | 7.291537223  |
| 6 | -2.865415568 | 5.692338652  | -3.424407211 |
| 6 | -8.981312322 | 0.208115060  | 6.378527808  |
| 1 | -8.497394546 | 5.638093240  | -2.540558879 |
| 1 | -4.750266600 | -3.441770907 | 7.508827887  |
| 1 | -1.782564743 | 5.695730846  | -3.594173225 |
| 1 | -9.792750999 | 0.910447271  | 6.159778252  |
| 1 | -8.755558603 | -0.972744229 | -4.237967592 |
| 6 | -7.900739496 | -1.322752127 | -4.828026031 |
| 1 | -8.884061215 | -4.877877013 | 1.870027494  |
| 6 | -8.173044874 | -5.204123532 | 1.102564687  |
| 1 | -4.427819842 | 4.759761204  | 4.360988213  |
| 6 | -5.496483574 | 4.983174882  | 4.234063452  |
| 1 | -6.483656120 | -0.908182061 | -3.259416792 |
| 6 | -6.628573996 | -0.643181408 | -4.316301426 |
| 1 | -8.649167497 | -7.289028377 | 1.359176063  |
| 6 | -7.759602999 | -6.649680862 | 1.385251962  |
| 1 | -5.519576349 | 4.379673003  | 2.159002454  |
| 6 | -5.780573765 | 5.265554502  | 2.756839893  |
| 1 | -7.069219733 | -1.184248661 | -8.165373628 |
| 6 | -6.920034509 | -1.443412013 | -7.111143567 |
| 1 | -5.055791975 | -4.125745753 | 0.106283539  |
| 6 | -5.948804755 | -4.766419845 | 0.077885223  |
| 1 | -7.609225118 | 7.400144691  | 5.474848075  |
| 6 | -7.345207962 | 6.517429242  | 4.882169137  |
| 1 | -4.792513995 | -1.107622306 | -7.191082716 |
| 6 | -5.649351861 | -0.760656652 | -6.600486452 |
| 1 | -4.824420698 | -6.542501221 | -0.406187866 |
| 6 | -5.536339246 | -6.213205384 | 0.358981012  |
| 1 | -8.696596709 | 7.013794984  | 3.280996082  |
| 6 | -7.630412938 | 6.797250261  | 3.405377748  |
| 1 | -4.516077708 | -0.669177847 | -4.772314135 |
| 6 | -5.437211866 | -1.146022273 | -5.134659912 |
| 1 | -6.489417194 | -8.141207725 | 0.484150894  |
| 6 | -6.780641451 | -7.101082433 | 0.298718318  |
| 1 | -7.487232510 | 5.743667638  | 1.531890702  |
| 6 | -7.273775080 | 5.553069031  | 2.589685809  |
| 1 | -9.028691166 | -1.412579470 | -6.661519445 |
| 6 | -8.111724858 | -0.938604993 | -6.293838937 |
| 1 | -7.225231276 | -3.273072883 | 0.971185842  |
| 6 | -6.929446503 | -4.313996785 | 1.161520241  |
| 1 | -5.637919292 | 6.040678006  | 6.107965165  |
| 6 | -5.851491369 | 6.229302894  | 5.049290873  |
| 1 | -9.102361091 | 0.927081053  | -5.850084252 |
| 6 | -8.241031018 | 0.577577052  | -6.424850619 |
| 1 | -6.988777444 | -4.082113094 | 3.303055852  |
| 6 | -6.280104132 | -4.413250178 | 2.539832385  |
| 1 | -3.961890922 | 7.219462165  | 4.709843352  |
| 6 | -5.027389146 | 7.423847334  | 4.573138118  |
| 1 | -5.147541227 | -2.925944658 | -3.947501795 |
| 6 | -5.310379889 | -2.661474656 | -4.996481818 |



|   |              |              |              |
|---|--------------|--------------|--------------|
| 1 | -8.306439936 | -7.646438559 | -1.127445958 |
| 6 | -7.429828007 | -6.997126586 | -1.080293862 |
| 1 | -7.853939280 | 3.473776283  | 2.464175754  |
| 6 | -8.098226526 | 4.357898632  | 3.061087814  |
| 1 | -8.405799173 | 0.847322552  | -7.470001748 |
| 1 | -5.402554481 | -3.761113082 | 2.588406717  |
| 1 | -5.276131223 | 8.304475815  | 5.168435404  |
| 1 | -4.449918922 | -3.015021394 | -5.570681315 |
| 1 | -6.725924753 | -7.329048747 | -1.847296763 |
| 1 | -9.160825860 | 4.566245965  | 2.923728061  |
| 1 | -5.843159417 | 1.356050254  | -4.073661033 |
| 6 | -6.751677712 | 0.873014258  | -4.447392741 |
| 1 | -6.824634569 | -7.787666795 | 2.963640456  |
| 6 | -7.105854284 | -6.751810993 | 2.762124641  |
| 1 | -5.155278291 | 6.643219740  | 1.218469607  |
| 6 | -4.956659958 | 6.458660244  | 2.276895281  |
| 1 | -8.693338199 | -3.316201172 | -5.050632555 |
| 6 | -7.778515396 | -2.838806087 | -4.693132584 |
| 1 | -9.150820943 | -4.077484920 | -0.458448414 |
| 6 | -8.832930981 | -5.105521733 | -0.270829329 |
| 1 | -6.106746192 | 3.606410585  | 5.773514688  |
| 6 | -6.322083557 | 3.793482201  | 4.719081653  |
| 1 | -4.858524484 | 1.238295874  | -6.381920816 |
| 6 | -5.774343754 | 0.756166306  | -6.733752530 |
| 1 | -4.573102168 | -7.344039885 | 1.923643720  |
| 6 | -4.878747413 | -6.313074412 | 1.733724740  |
| 6 | -6.810060580 | 7.992312114  | 2.924775139  |
| 1 | -7.027149905 | 8.193449558  | 1.872421888  |
| 1 | -7.694688056 | -3.442749309 | -7.357938914 |
| 6 | -6.791857145 | -2.960107075 | -6.977991517 |
| 1 | -6.889747512 | -3.614612551 | -1.481196314 |
| 6 | -6.605210856 | -4.655118157 | -1.295775048 |
| 1 | -7.982336140 | 5.137329547  | 6.417059109  |
| 6 | -8.173880653 | 5.325803634  | 5.358042531  |
| 1 | -5.910387411 | 1.025151319  | -7.783242970 |
| 1 | -3.981439309 | -5.689070405 | 1.762461823  |
| 1 | -7.079444383 | 8.881875297  | 3.498040756  |
| 1 | -5.947438305 | -3.314939686 | -7.573812758 |
| 1 | -5.900525722 | -4.954865608 | -2.074060106 |
| 1 | -9.237149365 | 5.549248896  | 5.244725821  |
| 1 | -7.593992951 | 1.229210910  | -3.848110716 |
| 1 | -7.813540310 | -6.440063098 | 3.533383890  |
| 1 | -3.889525819 | 6.246188805  | 2.385053569  |
| 1 | -7.647933983 | -3.111418682 | -3.643259456 |
| 1 | -9.722294835 | -5.738474015 | -0.297951386 |
| 1 | -6.047733071 | 2.894961702  | 4.158347719  |
| 6 | -6.584877890 | -3.328126994 | -5.510281375 |
| 6 | -7.841723787 | -5.550417685 | -1.343653203 |
| 6 | -7.808939448 | 4.091414199  | 4.536596109  |
| 6 | -6.966025749 | 1.243583060  | -5.913077642 |
| 6 | -5.867646809 | -5.859780199 | 2.805782722  |
| 6 | -5.323004538 | 7.692497755  | 3.098827238  |
| 1 | -6.495210824 | -4.415991310 | -5.412889993 |
| 1 | -8.308962024 | -5.475327065 | -2.331874863 |
| 1 | -8.401600601 | 3.234086715  | 4.876406700  |

|   |               |              |               |
|---|---------------|--------------|---------------|
| 1 | -7.057103331  | 2.331529277  | -6.005787629  |
| 1 | -5.398031962  | -5.932584072 | 3.793845482   |
| 1 | -4.732053071  | 8.548635260  | 2.755569874   |
| 6 | -10.141381496 | -1.348823279 | 0.534179408   |
| 6 | -9.011843879  | -0.976056708 | -0.422651789  |
| 6 | -9.399864560  | 0.273722619  | -1.209083413  |
| 1 | -9.857487115  | -2.238734992 | 1.108564129   |
| 1 | -8.091598506  | -0.797795417 | 0.144232601   |
| 1 | -8.819750045  | -1.798509439 | -1.117242249  |
| 1 | -8.580205703  | 0.540000866  | -1.889010595  |
| 6 | -10.401833760 | -0.187426242 | 1.490701903   |
| 6 | -11.405266659 | -1.637201480 | -0.271907954  |
| 6 | -10.665668069 | -0.001607691 | -2.025256787  |
| 6 | -9.672501169  | 1.445674831  | -0.263121012  |
| 6 | -10.799134182 | 1.053504891  | 0.694645256   |
| 1 | -11.203104831 | -0.453238517 | 2.183115850   |
| 1 | -9.504715418  | 0.022296076  | 2.080996888   |
| 6 | -11.794026964 | -0.393053848 | -1.068023921  |
| 1 | -11.232096097 | -2.475435502 | -0.951335380  |
| 1 | -12.218557287 | -1.917000377 | 0.400390942   |
| 6 | -11.057578124 | 1.239023039  | -2.824889414  |
| 1 | -10.476807064 | -0.834146967 | -2.714202331  |
| 6 | -10.062128141 | 2.687675659  | -1.061181751  |
| 1 | -8.768881976  | 1.666074919  | 0.320723297   |
| 6 | -12.064617266 | 0.777278561  | -0.119903958  |
| 1 | -10.985547866 | 1.881265751  | 1.388445815   |
| 1 | -12.699261468 | -0.604721233 | -1.647764161  |
| 6 | -11.326133290 | 2.398017629  | -1.867180528  |
| 1 | -10.253809975 | 1.506708708  | -3.516565292  |
| 1 | -11.950619644 | 1.029800771  | -3.417381643  |
| 1 | -10.235040704 | 3.524205766  | -0.380739967  |
| 1 | -9.248275411  | 2.969870085  | -1.734810990  |
| 6 | -12.459221584 | 2.019629256  | -0.915726970  |
| 1 | -12.879713463 | 0.506522955  | 0.560868296   |
| 1 | -11.608996548 | 3.288529368  | -2.438931538  |
| 1 | -13.370694035 | 1.821611295  | -1.483619760  |
| 1 | -12.664029498 | 2.848866670  | -0.234824262  |
| 6 | 4.506586207   | -4.991317616 | -8.165582555  |
| 1 | 5.302909482   | -4.433322146 | -8.673170231  |
| 6 | 5.094800423   | -6.270902239 | -7.567286713  |
| 1 | 5.877896742   | -6.005537595 | -6.846520614  |
| 6 | 2.316208411   | -6.134597995 | -8.459672267  |
| 1 | 1.532850865   | -6.399566339 | -9.180008297  |
| 1 | 2.108572220   | -7.973280255 | -7.351179261  |
| 6 | 2.903496811   | -7.414198476 | -7.860399930  |
| 1 | 4.398104759   | -7.944471331 | -6.399600793  |
| 6 | 3.981903547   | -7.032538248 | -6.843790868  |
| 1 | 3.009887945   | -4.459715057 | -9.624089808  |
| 6 | 3.428367879   | -5.371980895 | -9.182716803  |
| 6 | 4.029169969   | -6.237428598 | -10.288003827 |
| 1 | 4.812364458   | -5.681438135 | -10.809162125 |
| 6 | 3.383980520   | -6.162849840 | -5.739747576  |
| 1 | 4.160020167   | -5.903284209 | -5.015345465  |
| 1 | 3.258160503   | -6.493315995 | -11.018710921 |
| 1 | 2.604528784   | -6.716836430 | -5.211131090  |

|   |             |              |               |
|---|-------------|--------------|---------------|
| 1 | 6.127939372 | -8.043980310 | -8.235269722  |
| 6 | 5.697560084 | -7.138826599 | -8.670066741  |
| 6 | 3.907529769 | -4.120203162 | -7.063584210  |
| 1 | 3.503654046 | -3.203069147 | -7.499329392  |
| 6 | 3.503218215 | -8.283675711 | -8.963797581  |
| 1 | 3.908579920 | -9.201993853 | -8.532521823  |
| 1 | 1.286364462 | -4.358188612 | -7.797285495  |
| 6 | 1.714337286 | -5.263755702 | -7.359326066  |
| 1 | 2.725404441 | -8.564190656 | -9.678104132  |
| 1 | 0.910131412 | -5.805367258 | -6.855524824  |
| 1 | 6.500559558 | -6.594261333 | -9.172528004  |
| 1 | 4.686184615 | -3.839870549 | -6.349533644  |
| 6 | 2.799128404 | -4.892018962 | -6.351613446  |
| 6 | 4.610821023 | -7.510421942 | -9.676703663  |
| 1 | 2.364661822 | -4.269024255 | -5.560793987  |
| 1 | 5.041485619 | -8.133562151 | -10.468029074 |
| 6 | 4.577391773 | 0.703186738  | -12.313607494 |
| 1 | 5.566618033 | 0.488027571  | -12.734332319 |
| 6 | 4.685491266 | 0.787491223  | -10.789653389 |
| 1 | 5.381754242 | 1.591907343  | -10.522843750 |
| 6 | 2.235368720 | -0.110000034 | -12.103568546 |
| 1 | 1.536631144 | -0.911752746 | -12.371862769 |
| 1 | 1.351148152 | 0.192114111  | -10.163762150 |
| 6 | 2.342952452 | -0.025295221 | -10.579905160 |
| 1 | 3.381937838 | 1.180486988  | -9.121562811  |
| 6 | 3.304813895 | 1.107156116  | -10.213780695 |
| 1 | 3.544763250 | -0.506768409 | -13.769703942 |
| 6 | 3.616625253 | -0.430896937 | -12.678602113 |
| 6 | 4.126835753 | -1.756117592 | -12.114114726 |
| 1 | 5.106631631 | -1.986579319 | -12.538549047 |
| 6 | 2.793789999 | 2.433023804  | -10.772595609 |
| 1 | 3.477225020 | 3.239199998  | -10.495220533 |
| 1 | 3.444731861 | -2.564567251 | -12.388776518 |
| 1 | 1.814002476 | 2.662064185  | -10.345215799 |
| 1 | 5.282761917 | -0.464445246 | -9.133371977  |
| 6 | 5.197157815 | -0.535067143 | -10.221173133 |
| 6 | 4.067930876 | 2.028914479  | -12.877075493 |
| 1 | 4.005280560 | 1.968613298  | -13.965936705 |
| 6 | 2.851856587 | -1.348855260 | -10.012610500 |
| 1 | 2.916131372 | -1.284205469 | -8.922201374  |
| 1 | 1.633566330 | 1.145524004  | -13.752551840 |
| 6 | 1.722361449 | 1.214584291  | -12.666123301 |
| 1 | 2.152893449 | -2.152018334 | -10.262315212 |
| 1 | 0.729595728 | 1.428913241  | -12.262008090 |
| 1 | 6.189992953 | -0.751539015 | -10.622023946 |
| 1 | 4.766182901 | 2.830872289  | -12.625621937 |
| 6 | 2.690490144 | 2.335470468  | -12.293193066 |
| 6 | 4.229685321 | -1.655909356 | -10.594218769 |
| 1 | 2.324245934 | 3.285923229  | -12.697310554 |
| 1 | 4.596024180 | -2.605158999 | -10.188246835 |
| 6 | 4.097996815 | 3.117380164  | -4.926312677  |
| 1 | 3.124777906 | 2.797441179  | -5.317462214  |
| 6 | 4.717959533 | 4.128586301  | -5.891851626  |
| 1 | 4.052534916 | 4.996136504  | -5.982346078  |
| 6 | 6.367331348 | 2.355097118  | -4.254604697  |

|   |               |              |              |
|---|---------------|--------------|--------------|
| 1 | 7.030175671   | 1.486753375  | -4.161288548 |
| 1 | 7.963064097   | 3.685907306  | -4.829527044 |
| 6 | 6.990070460   | 3.366305804  | -5.220362221 |
| 1 | 6.512674014   | 5.317820626  | -6.004076577 |
| 6 | 6.065573159   | 4.582209728  | -5.325811783 |
| 1 | 4.569647364   | 1.169263942  | -4.137361274 |
| 6 | 5.019526442   | 1.901348322  | -4.819810638 |
| 6 | 5.209485989   | 1.262812231  | -6.194108294 |
| 1 | 4.244409473   | 0.927185494  | -6.584449523 |
| 6 | 5.869838355   | 5.219803870  | -3.951221056 |
| 1 | 5.218769704   | 6.093489998  | -4.037140753 |
| 1 | 5.858489863   | 0.387230040  | -6.110168044 |
| 1 | 6.831753914   | 5.556703937  | -3.558517716 |
| 1 | 5.340190767   | 4.222425146  | -7.955355169 |
| 6 | 4.907729439   | 3.492519274  | -7.267450762 |
| 6 | 3.899360536   | 3.748035668  | -3.550553360 |
| 1 | 3.444561285   | 3.018076948  | -2.874287228 |
| 6 | 7.183401936   | 2.730268460  | -6.595572202 |
| 1 | 7.640787412   | 3.451821008  | -7.276156857 |
| 1 | 5.752187187   | 2.261589672  | -2.186213762 |
| 6 | 6.177347129   | 2.992276014  | -2.879445399 |
| 1 | 7.855701144   | 1.872680795  | -6.516168798 |
| 1 | 7.144645564   | 3.305176123  | -2.480308961 |
| 1 | 3.939868690   | 3.185716978  | -7.672490241 |
| 1 | 3.221125210   | 4.602273483  | -3.628734459 |
| 6 | 5.249779283   | 4.199557691  | -2.998786744 |
| 6 | 5.831199881   | 2.282291934  | -7.145945606 |
| 1 | 5.110752044   | 4.654956915  | -2.010605678 |
| 1 | 5.970127383   | 1.826179044  | -8.131647083 |
| 6 | -11.665241898 | -5.697913163 | 3.326252264  |
| 1 | -11.147540431 | -6.464425211 | 2.736456378  |
| 6 | -10.736737417 | -5.208926713 | 4.440248969  |
| 1 | -9.829891353  | -4.778247795 | 3.994105093  |
| 6 | -13.639836148 | -5.225282429 | 4.767753631  |
| 1 | -14.544687561 | -5.652517600 | 5.214800464  |
| 1 | -13.225252251 | -3.965830977 | 6.469258607  |
| 6 | -12.710846513 | -4.735247648 | 5.880814863  |
| 1 | -10.795025233 | -3.766551866 | 6.040358863  |
| 6 | -11.459247459 | -4.127283306 | 5.245126528  |
| 1 | -13.580687709 | -6.674464249 | 3.171700037  |
| 6 | -12.916109145 | -6.308415937 | 3.963196851  |
| 6 | -12.529791268 | -7.471469031 | 4.874944134  |
| 1 | -12.027386083 | -8.248036897 | 4.292918016  |
| 6 | -11.842781132 | -2.963408548 | 4.334047968  |
| 1 | -10.943321541 | -2.523312313 | 3.891852764  |
| 1 | -13.427843874 | -7.911162163 | 5.314373440  |
| 1 | -12.346842458 | -2.189161937 | 4.917477135  |
| 1 | -9.668444713  | -6.016914499 | 6.132756704  |
| 6 | -10.346389136 | -6.370566697 | 5.351166280  |
| 6 | -12.055669881 | -4.537469298 | 2.412768955  |
| 1 | -12.711278350 | -4.897679832 | 1.616620849  |
| 6 | -12.322994064 | -5.895310042 | 6.795266511  |
| 1 | -11.671421270 | -5.534894553 | 7.595385959  |
| 1 | -14.704721622 | -4.411265232 | 3.075051821  |
| 6 | -14.028592617 | -4.061150991 | 3.858446390  |

|   |               |              |              |
|---|---------------|--------------|--------------|
| 1 | -13.217893704 | -6.317635604 | 7.257422018  |
| 1 | -14.553695888 | -3.296752337 | 4.436492175  |
| 1 | -9.822697212  | -7.136601179 | 4.773430111  |
| 1 | -11.164436605 | -4.115046460 | 1.941951897  |
| 6 | -12.771442054 | -3.464953695 | 3.230524806  |
| 6 | -11.603426836 | -6.967743300 | 5.979936879  |
| 1 | -13.051178284 | -2.629381598 | 2.577865933  |
| 1 | -11.324910131 | -7.801268511 | 6.634070147  |
| 6 | -10.413705118 | 8.017156104  | 0.884593069  |
| 1 | -9.497536579  | 8.322132738  | 1.404377886  |
| 6 | -10.996976630 | 9.227216750  | 0.151898098  |
| 1 | -10.263580436 | 9.595748976  | -0.575985187 |
| 6 | -12.703397543 | 7.087642099  | 1.172279758  |
| 1 | -13.436709152 | 6.721197888  | 1.899662622  |
| 1 | -14.203916322 | 7.996570937  | -0.079694006 |
| 6 | -13.286552666 | 8.297668676  | 0.439805791  |
| 1 | -12.681022393 | 9.651191128  | -1.125849391 |
| 6 | -12.264922068 | 8.792476717  | -0.586667402 |
| 1 | -11.019279429 | 6.656114846  | 2.445745731  |
| 6 | -11.434696440 | 7.520285435  | 1.910355539  |
| 6 | -11.757171150 | 8.628155261  | 2.910231408  |
| 1 | -10.849540388 | 8.923543167  | 3.443557039  |
| 6 | -11.939123729 | 7.681517533  | -1.583472138 |
| 1 | -11.219621737 | 8.044226505  | -2.321957967 |
| 1 | -12.475907536 | 8.264739492  | 3.649147065  |
| 1 | -12.845276508 | 7.384368122  | -2.116463987 |
| 1 | -11.723201542 | 11.204406279 | 0.620758384  |
| 6 | -11.319746320 | 10.337921818 | 1.149344459  |
| 6 | -10.084830340 | 6.906958457  | -0.110479077 |
| 1 | -9.653943480  | 6.050482507  | 0.415740920  |
| 6 | -13.613066700 | 9.406372693  | 1.438375653  |
| 1 | -14.042635564 | 10.262747997 | 0.913826844  |
| 1 | -11.969188318 | 5.111962924  | 0.715010549  |
| 6 | -12.376654337 | 5.974473982  | 0.179363108  |
| 1 | -14.353008138 | 9.049359416  | 2.158740083  |
| 1 | -13.286561335 | 5.652588970  | -0.332905405 |
| 1 | -10.406946463 | 10.653062029 | 1.661409160  |
| 1 | -9.346736538  | 7.265039754  | -0.832282095 |
| 6 | -11.357952881 | 6.482039350  | -0.838671337 |
| 6 | -12.338790683 | 9.828888507  | 2.166849029  |
| 1 | -11.123497123 | 5.684378526  | -1.553555084 |
| 1 | -12.571797987 | 10.624841087 | 2.882526120  |
| 6 | -12.350916572 | 2.287818731  | 4.292565230  |
| 1 | -11.525938755 | 1.617612613  | 4.017699740  |
| 6 | -12.655117749 | 2.127289844  | 5.783884216  |
| 1 | -11.761618387 | 2.388185745  | 6.365627525  |
| 6 | -14.736654691 | 2.858786567  | 3.869969379  |
| 1 | -15.629711560 | 2.600431164  | 3.288831099  |
| 1 | -15.864875999 | 3.363642503  | 5.636698722  |
| 6 | -15.040492886 | 2.695876277  | 5.361035222  |
| 1 | -14.006349599 | 2.976476473  | 7.232551070  |
| 6 | -13.793284723 | 3.077624975  | 6.161906399  |
| 1 | -13.385514561 | 2.012979467  | 2.420837646  |
| 6 | -13.598542478 | 1.908574105  | 3.491513527  |
| 6 | -13.995774215 | 0.464788550  | 3.789557545  |

|   |               |              |             |
|---|---------------|--------------|-------------|
| 1 | -13.183710166 | -0.209386475 | 3.505171022 |
| 6 | -13.394303102 | 4.521206858  | 5.861859722 |
| 1 | -12.512270611 | 4.791900412  | 6.448193973 |
| 1 | -14.877402928 | 0.192934173  | 3.204071294 |
| 1 | -14.204777444 | 5.196214840  | 6.145683198 |
| 1 | -13.249159467 | 0.568032929  | 7.153169903 |
| 6 | -13.049958514 | 0.683452549  | 6.085251550 |
| 6 | -11.950896757 | 3.730158171  | 3.991521317 |
| 1 | -11.721940207 | 3.837375079  | 2.927116385 |
| 6 | -15.439350528 | 1.252412226  | 5.662347248 |
| 1 | -15.668048556 | 1.145188525  | 6.725240245 |
| 1 | -14.135450712 | 4.409054360  | 2.496106289 |
| 6 | -14.338011621 | 4.301196049  | 3.564873203 |
| 1 | -16.337937960 | 0.990855267  | 5.098659828 |
| 1 | -15.159139908 | 4.974834539  | 3.820616202 |
| 1 | -12.225026306 | 0.015545813  | 5.824857282 |
| 1 | -11.052294328 | 3.988297974  | 4.557991744 |
| 6 | -13.094230664 | 4.667498796  | 4.371783042 |
| 6 | -14.294726985 | 0.316873538  | 5.279769481 |
| 1 | -12.805746676 | 5.702562438  | 4.156131712 |
| 1 | -14.580766541 | -0.719165146 | 5.495944496 |

**Table S5.** Geometries of diamantane (**D**), 1-diamantyl cation (**Dp**) and cluster **CL2** in Cartesian coordinates in Å computed at the B3LYP-D3(BJ)/def2-TZVPP level of theory at 0.4 K.

| <b>D</b> |              |              |             |
|----------|--------------|--------------|-------------|
| 1        | -6.919405000 | -0.684186000 | 4.112531000 |
| 6        | -6.672461000 | -0.929893000 | 5.150127000 |
| 1        | -6.649210000 | -3.060076000 | 4.789943000 |
| 6        | -7.160817000 | -2.360836000 | 5.457925000 |
| 1        | -7.545116000 | 0.408312000  | 8.210649000 |
| 6        | -7.033480000 | -0.290910000 | 7.542642000 |
| 1        | -7.274893000 | -1.967487000 | 8.888117000 |
| 6        | -7.521811000 | -1.721773000 | 7.850513000 |
| 1        | -7.120843000 | -3.721523000 | 7.137945000 |
| 6        | -6.788402000 | -2.702670000 | 6.915427000 |
| 1        | -7.073275000 | 1.069765000  | 5.862804000 |
| 6        | -7.405775000 | 0.050895000  | 6.085162000 |
| 1        | -9.182921000 | 0.223808000  | 4.859005000 |
| 6        | -8.920786000 | -0.049895000 | 5.885330000 |
| 1        | -4.764508000 | -3.308742000 | 6.454409000 |
| 6        | -5.273450000 | -2.601713000 | 7.115411000 |
| 1        | -9.429453000 | 0.657097000  | 6.546556000 |
| 1        | -5.011430000 | -2.875362000 | 8.141775000 |
| 1        | -9.011449000 | -3.483198000 | 5.458955000 |
| 6        | -8.675658000 | -2.462211000 | 5.255161000 |
| 1        | -4.809216000 | 0.173792000  | 5.105482000 |
| 6        | -5.157656000 | -0.833076000 | 5.353750000 |
| 1        | -9.385017000 | -2.825508000 | 7.895116000 |
| 6        | -9.036572000 | -1.818639000 | 7.646854000 |
| 1        | -5.182849000 | 0.831509000  | 7.541898000 |
| 6        | -5.518700000 | -0.189522000 | 7.745506000 |
| 1        | -9.545687000 | -1.126426000 | 8.323200000 |
| 1        | -5.263433000 | -0.411230000 | 8.785941000 |
| 1        | -8.931043000 | -2.240631000 | 4.214730000 |

|   |               |              |             |
|---|---------------|--------------|-------------|
| 1 | -4.648547000  | -1.525322000 | 4.677467000 |
| 6 | -4.804717000  | -1.171873000 | 6.808941000 |
| 6 | -9.389542000  | -1.479740000 | 6.191702000 |
| 1 | -3.724204000  | -1.097992000 | 6.954890000 |
| 1 | -10.470087000 | -1.553640000 | 6.046003000 |

---

**Dp**

|   |             |              |              |
|---|-------------|--------------|--------------|
| 1 | 4.616992000 | -0.805307000 | -3.878954000 |
| 1 | 6.457157000 | -0.880542000 | 0.023944000  |
| 1 | 3.600035000 | -3.008865000 | -3.391293000 |
| 1 | 6.311593000 | 0.151226000  | -2.276359000 |
| 1 | 5.406887000 | -3.089614000 | 0.425784000  |
| 1 | 3.038739000 | -2.226588000 | 0.648351000  |
| 1 | 2.360740000 | -0.903762000 | -2.806440000 |
| 1 | 4.729754000 | 0.907218000  | -0.535416000 |
| 1 | 5.871620000 | -2.856135000 | -4.507830000 |
| 1 | 8.112632000 | -1.651888000 | -1.719150000 |
| 1 | 6.033747000 | -4.732299000 | -1.245392000 |
| 1 | 4.197527000 | -0.991054000 | 1.091856000  |
| 1 | 1.940510000 | -2.174939000 | -1.676817000 |
| 1 | 3.971995000 | 0.943105000  | -2.115749000 |
| 1 | 7.006583000 | -1.601684000 | -4.064194000 |
| 1 | 7.702601000 | -2.937051000 | -0.606422000 |
| 1 | 5.265316000 | -4.704433000 | -2.864122000 |
| 6 | 5.632767000 | -4.103468000 | -2.036314000 |
| 6 | 6.225303000 | -2.254413000 | -3.670056000 |
| 6 | 7.297569000 | -2.301151000 | -1.394577000 |
| 6 | 2.754068000 | -1.524890000 | -2.001274000 |
| 6 | 4.368277000 | 0.274752000  | -1.348819000 |
| 6 | 3.819101000 | -1.574828000 | 0.252474000  |
| 6 | 6.808920000 | -3.139841000 | -2.573007000 |
| 6 | 3.263761000 | -0.661321000 | -0.843679000 |
| 6 | 6.154209000 | -1.448077000 | -0.856460000 |
| 6 | 4.686232000 | -3.100977000 | -1.570016000 |
| 6 | 5.093424000 | -1.404979000 | -3.103294000 |
| 6 | 5.538953000 | -0.536804000 | -1.922879000 |
| 6 | 4.960525000 | -2.425552000 | -0.311676000 |
| 6 | 3.898811000 | -2.379562000 | -2.555342000 |
| 1 | 7.587780000 | -3.798369000 | -2.953981000 |
| 1 | 2.440484000 | -0.071582000 | -0.440365000 |

---

**CL2**

|   |              |              |              |
|---|--------------|--------------|--------------|
| 1 | -0.996108000 | 0.145457000  | -1.994674000 |
| 1 | 0.776530000  | 1.889518000  | -2.001402000 |
| 1 | 2.004285000  | -2.875165000 | -1.418604000 |
| 1 | 3.768082000  | -1.125488000 | -1.410082000 |
| 1 | 3.158916000  | 1.214310000  | -2.001774000 |
| 1 | -0.380542000 | -2.204357000 | -1.424296000 |
| 1 | -0.520726000 | -1.591488000 | -3.846303000 |
| 1 | 2.111276000  | 1.828198000  | 0.171535000  |
| 1 | 0.704863000  | -2.818351000 | -3.579555000 |
| 1 | 3.333072000  | 0.587019000  | 0.400407000  |
| 1 | 1.847248000  | 1.286219000  | -4.161328000 |
| 1 | -0.832300000 | -0.481406000 | 0.407016000  |
| 1 | 3.627962000  | -0.492257000 | -3.810973000 |

|   |              |              |              |
|---|--------------|--------------|--------------|
| 1 | 0.928353000  | -2.270359000 | 0.743377000  |
| 1 | 3.163440000  | -2.170295000 | -3.581411000 |
| 1 | 2.632175000  | -1.847769000 | 0.754287000  |
| 1 | 0.149617000  | 0.847005000  | -4.182008000 |
| 1 | -0.344449000 | 1.194970000  | 0.164065000  |
| 6 | -0.066793000 | 0.157779000  | -0.043029000 |
| 6 | 1.113175000  | 0.611646000  | -3.716615000 |
| 6 | 1.670929000  | -1.604040000 | 0.296343000  |
| 6 | 2.866090000  | -1.139857000 | -3.370952000 |
| 6 | 2.353936000  | 0.783625000  | -0.042154000 |
| 6 | 0.449945000  | -1.774947000 | -3.380195000 |
| 6 | 1.303979000  | -0.142722000 | 0.581882000  |
| 6 | 1.499253000  | -0.846949000 | -4.000152000 |
| 6 | 1.739427000  | -1.833989000 | -1.215800000 |
| 6 | 2.794381000  | -0.911278000 | -1.858413000 |
| 6 | 0.001119000  | -0.079240000 | -1.553133000 |
| 6 | 1.042435000  | 0.847140000  | -2.204668000 |
| 6 | 2.414329000  | 0.551163000  | -1.554218000 |
| 6 | 0.368719000  | -1.540355000 | -1.867186000 |
| 1 | 1.254993000  | 0.027062000  | 1.658990000  |
| 1 | 1.545004000  | -1.014892000 | -5.077956000 |
| 6 | -4.690910000 | -0.913296000 | -3.807075000 |
| 6 | -5.615556000 | -0.717173000 | -2.609384000 |
| 6 | -5.252860000 | 0.575511000  | -1.885009000 |
| 1 | -4.895717000 | -1.849796000 | -4.324507000 |
| 1 | -6.651929000 | -0.669036000 | -2.949440000 |
| 1 | -5.549458000 | -1.565653000 | -1.926480000 |
| 1 | -5.859332000 | 0.716619000  | -0.989975000 |
| 6 | -4.769022000 | 0.282171000  | -4.755887000 |
| 6 | -3.189836000 | -1.010948000 | -3.266891000 |
| 6 | -3.725902000 | 0.480859000  | -1.333176000 |
| 6 | -5.329750000 | 1.805848000  | -2.799052000 |
| 6 | -4.418085000 | 1.564670000  | -4.007304000 |
| 1 | -4.097861000 | 0.140998000  | -5.604393000 |
| 1 | -5.778619000 | 0.363326000  | -5.163228000 |
| 6 | -3.047093000 | 0.287444000  | -2.611884000 |
| 1 | -3.103433000 | -1.850896000 | -2.581998000 |
| 1 | -2.523231000 | -1.140087000 | -4.113433000 |
| 6 | -3.383706000 | 1.773453000  | -0.588793000 |
| 1 | -3.662414000 | -0.402351000 | -0.700144000 |
| 6 | -4.935538000 | 3.085389000  | -2.049710000 |
| 1 | -6.356622000 | 1.903758000  | -3.160069000 |
| 6 | -2.894823000 | 1.469562000  | -3.455075000 |
| 1 | -4.418179000 | 2.425718000  | -4.676928000 |
| 6 | -3.495316000 | 2.970896000  | -1.537158000 |
| 1 | -4.069641000 | 1.886333000  | 0.251628000  |
| 1 | -2.379803000 | 1.695738000  | -0.174683000 |
| 1 | -5.040464000 | 3.945215000  | -2.714455000 |
| 1 | -5.618129000 | 3.246240000  | -1.213466000 |
| 6 | -2.540505000 | 2.763478000  | -2.716394000 |
| 1 | -2.252852000 | 1.277872000  | -4.312206000 |
| 1 | -3.221156000 | 3.881485000  | -1.003592000 |
| 1 | -1.505718000 | 2.715159000  | -2.375076000 |
| 1 | -2.607028000 | 3.594260000  | -3.419838000 |



**Table S6.** Geometries of diamantane (**D**), 1-diamantyl cation (**Dp**) and cluster **CL2** in Cartesian coordinates in Å computed at the B3LYP/def2-TZVPP level of theory at 0.4 K.

| <b>D</b> |               |              |             |
|----------|---------------|--------------|-------------|
| 1        | -6.914927000  | -0.682410000 | 4.108622000 |
| 6        | -6.670493000  | -0.929030000 | 5.147510000 |
| 1        | -6.652446000  | -3.063477000 | 4.785970000 |
| 6        | -7.162046000  | -2.363009000 | 5.455612000 |
| 1        | -7.541825000  | 0.411779000  | 8.214712000 |
| 6        | -7.032220000  | -0.288692000 | 7.545079000 |
| 1        | -7.279316000  | -1.969308000 | 8.892068000 |
| 6        | -7.523765000  | -1.722669000 | 7.853188000 |
| 1        | -7.117076000  | -3.725771000 | 7.139546000 |
| 6        | -6.786774000  | -2.705436000 | 6.916437000 |
| 1        | -7.077180000  | 1.074071000  | 5.861158000 |
| 6        | -7.407482000  | 0.053730000  | 6.084246000 |
| 1        | -9.188732000  | 0.227013000  | 4.857421000 |
| 6        | -8.925752000  | -0.047948000 | 5.883931000 |
| 1        | -4.758463000  | -3.312096000 | 6.456912000 |
| 6        | -5.268511000  | -2.603748000 | 7.116759000 |
| 1        | -9.435769000  | 0.660415000  | 6.543786000 |
| 1        | -5.005535000  | -2.878725000 | 8.143267000 |
| 1        | -9.016769000  | -3.485942000 | 5.455361000 |
| 6        | -8.680215000  | -2.464161000 | 5.252928000 |
| 1        | -4.802802000  | 0.174842000  | 5.102603000 |
| 6        | -5.152466000  | -0.832003000 | 5.352198000 |
| 1        | -9.391463000  | -2.826543000 | 7.898094000 |
| 6        | -9.041791000  | -1.819700000 | 7.648502000 |
| 1        | -5.177498000  | 0.834252000  | 7.545347000 |
| 6        | -5.514053000  | -0.187530000 | 7.747771000 |
| 1        | -9.552036000  | -1.128502000 | 8.326162000 |
| 1        | -5.257473000  | -0.407413000 | 8.788994000 |
| 1        | -8.936795000  | -2.244283000 | 4.211703000 |
| 1        | -4.642219000  | -1.523206000 | 4.674548000 |
| 6        | -4.798727000  | -1.171606000 | 6.809716000 |
| 6        | -9.395534000  | -1.480086000 | 6.190984000 |
| 1        | -3.717451000  | -1.097679000 | 6.955692000 |
| 1        | -10.476811000 | -1.554025000 | 6.045039000 |

| <b>Dp</b> |             |              |              |
|-----------|-------------|--------------|--------------|
| 1         | 4.620582000 | -0.805329000 | -3.884785000 |
| 1         | 6.463976000 | -0.880474000 | 0.024761000  |
| 1         | 3.595979000 | -3.009718000 | -3.391661000 |
| 1         | 6.311143000 | 0.158016000  | -2.276142000 |
| 1         | 5.404683000 | -3.090495000 | 0.429107000  |
| 1         | 3.035280000 | -2.227826000 | 0.651555000  |
| 1         | 2.352207000 | -0.904554000 | -2.805915000 |
| 1         | 4.726508000 | 0.913435000  | -0.534454000 |
| 1         | 5.876372000 | -2.857142000 | -4.513345000 |
| 1         | 8.119956000 | -1.654804000 | -1.719759000 |
| 1         | 6.032229000 | -4.736808000 | -1.245319000 |
| 1         | 4.191507000 | -0.992381000 | 1.098364000  |
| 1         | 1.935640000 | -2.175862000 | -1.676425000 |
| 1         | 3.969015000 | 0.949080000  | -2.113676000 |
| 1         | 7.011638000 | -1.604444000 | -4.069507000 |

|   |             |              |              |
|---|-------------|--------------|--------------|
| 1 | 7.709822000 | -2.938137000 | -0.606515000 |
| 1 | 5.264167000 | -4.708886000 | -2.863185000 |
| 6 | 5.633794000 | -4.106150000 | -2.036886000 |
| 6 | 6.229386000 | -2.256198000 | -3.673843000 |
| 6 | 7.303084000 | -2.302977000 | -1.395331000 |
| 6 | 2.749078000 | -1.524389000 | -2.000620000 |
| 6 | 4.365531000 | 0.279014000  | -1.347429000 |
| 6 | 3.815434000 | -1.574502000 | 0.255951000  |
| 6 | 6.812546000 | -3.143601000 | -2.574762000 |
| 6 | 3.259102000 | -0.659018000 | -0.841350000 |
| 6 | 6.157963000 | -1.447452000 | -0.856004000 |
| 6 | 4.688893000 | -3.098685000 | -1.571196000 |
| 6 | 5.095399000 | -1.404391000 | -3.106456000 |
| 6 | 5.539809000 | -0.533027000 | -1.923272000 |
| 6 | 4.960215000 | -2.425018000 | -0.309278000 |
| 6 | 3.896646000 | -2.379066000 | -2.556490000 |
| 1 | 7.591755000 | -3.802880000 | -2.955881000 |
| 1 | 2.435272000 | -0.069005000 | -0.437722000 |

---

**CL2**

|   |              |              |              |
|---|--------------|--------------|--------------|
| 1 | -0.740306000 | 0.072392000  | -1.856089000 |
| 1 | 1.020452000  | 1.823549000  | -1.922110000 |
| 1 | 2.289267000  | -2.945670000 | -1.373349000 |
| 1 | 4.049298000  | -1.190530000 | -1.433828000 |
| 1 | 3.417055000  | 1.152830000  | -1.993164000 |
| 1 | -0.100863000 | -2.280363000 | -1.304651000 |
| 1 | -0.341383000 | -1.644220000 | -3.713479000 |
| 1 | 2.443465000  | 1.763977000  | 0.216875000  |
| 1 | 0.887448000  | -2.885557000 | -3.510416000 |
| 1 | 3.668897000  | 0.519727000  | 0.403359000  |
| 1 | 2.038636000  | 1.220461000  | -4.111111000 |
| 1 | -0.491181000 | -0.572621000 | 0.545399000  |
| 1 | 3.822889000  | -0.565865000 | -3.832903000 |
| 1 | 1.282136000  | -2.342704000 | 0.822501000  |
| 1 | 3.366298000  | -2.242345000 | -3.581127000 |
| 1 | 2.983616000  | -1.914120000 | 0.777742000  |
| 1 | 0.339551000  | 0.785798000  | -4.087466000 |
| 1 | -0.048391000 | 1.113093000  | 0.298322000  |
| 6 | 0.248014000  | 0.082828000  | 0.073417000  |
| 6 | 1.314778000  | 0.547051000  | -3.645654000 |
| 6 | 2.006683000  | -1.672268000 | 0.350918000  |
| 6 | 3.075717000  | -1.210637000 | -3.362707000 |
| 6 | 2.675277000  | 0.718302000  | -0.007088000 |
| 6 | 0.650951000  | -1.840941000 | -3.290116000 |
| 6 | 1.643198000  | -0.208968000 | 0.651148000  |
| 6 | 1.685186000  | -0.914783000 | -3.945840000 |
| 6 | 2.025422000  | -1.903864000 | -1.166422000 |
| 6 | 3.058358000  | -0.977580000 | -1.845892000 |
| 6 | 0.261551000  | -0.147148000 | -1.444912000 |
| 6 | 1.289701000  | 0.781097000  | -2.127811000 |
| 6 | 2.685147000  | 0.488486000  | -1.524691000 |
| 6 | 0.631185000  | -1.612356000 | -1.771265000 |
| 1 | 1.633987000  | -0.042001000 | 1.730757000  |
| 1 | 1.694869000  | -1.081583000 | -5.025844000 |
| 6 | -4.954392000 | -0.838788000 | -3.897318000 |

|   |              |              |              |
|---|--------------|--------------|--------------|
| 6 | -5.906346000 | -0.640272000 | -2.718271000 |
| 6 | -5.558093000 | 0.652208000  | -1.980359000 |
| 1 | -5.148618000 | -1.774476000 | -4.421297000 |
| 1 | -6.935331000 | -0.588995000 | -3.081662000 |
| 1 | -5.861182000 | -1.490929000 | -2.035564000 |
| 1 | -6.181898000 | 0.789485000  | -1.095930000 |
| 6 | -5.002234000 | 0.361737000  | -4.843243000 |
| 6 | -3.461866000 | -0.948269000 | -3.307587000 |
| 6 | -4.032955000 | 0.545130000  | -1.383699000 |
| 6 | -5.598637000 | 1.891083000  | -2.887547000 |
| 6 | -4.665392000 | 1.641710000  | -4.080429000 |
| 1 | -4.311474000 | 0.222313000  | -5.676975000 |
| 1 | -6.000504000 | 0.447277000  | -5.278836000 |
| 6 | -3.352108000 | 0.352115000  | -2.655278000 |
| 1 | -3.415371000 | -1.786954000 | -2.616585000 |
| 1 | -2.762158000 | -1.090391000 | -4.127171000 |
| 6 | -3.685373000 | 1.833503000  | -0.628444000 |
| 1 | -4.000243000 | -0.342752000 | -0.754638000 |
| 6 | -5.203937000 | 3.164221000  | -2.118525000 |
| 1 | -6.617159000 | 2.008063000  | -3.269072000 |
| 6 | -3.144790000 | 1.530813000  | -3.485593000 |
| 1 | -4.635118000 | 2.504559000  | -4.747955000 |
| 6 | -3.772189000 | 3.036402000  | -1.576248000 |
| 1 | -4.375541000 | 1.950933000  | 0.208461000  |
| 1 | -2.683031000 | 1.742534000  | -0.205921000 |
| 1 | -5.289604000 | 4.030708000  | -2.778225000 |
| 1 | -5.903636000 | 3.326674000  | -1.296084000 |
| 6 | -2.797125000 | 2.826873000  | -2.740860000 |
| 1 | -2.488699000 | 1.327283000  | -4.330085000 |
| 1 | -3.502633000 | 3.944505000  | -1.034995000 |
| 1 | -1.763017000 | 2.779526000  | -2.393990000 |
| 1 | -2.854122000 | 3.657375000  | -3.446628000 |

---
